1 **A combined EM and proteomic analysis places HIV-1 Vpu at the crossroads of retromer and ESCRT**  
2 **complexes: PTPN23 is a Vpu-cofactor**

3 Short title: **Spatial proteomics identifies Vpu targets and cofactors**

4 Charlotte A. Stoneham<sup>1\*</sup>, Simon Langer<sup>2</sup>, Paul D. De Jesus<sup>2</sup>, Jacob M. Wozniak<sup>3</sup>, John Lapek<sup>3</sup>, Thomas  
5 Deerinck<sup>4</sup>, Andrea Thor<sup>4</sup>, Lars Pache<sup>2</sup>, Sumit K. Chanda<sup>2</sup>, David J. Gonzalez<sup>3</sup>, Mark Ellisman<sup>4,5</sup>, John  
6 Guatelli<sup>1\*</sup>

7 <sup>1</sup> Department of Medicine, University of California, San Diego School of Medicine and Veterans Affairs  
8 San Diego Healthcare System, La Jolla, California, USA

9 <sup>2</sup> Infectious and Inflammatory Disease Center, Sanford Burnham Prebys Medical Discovery Institute,  
10 10901 North Torrey Pines Road, La Jolla, California, USA

11 <sup>3</sup> Department of Pharmacology, Skaggs School of Pharmacy and Pharmaceutical Sciences, University of  
12 California, San Diego, La Jolla, California, USA

13 <sup>4</sup> National Center for Microscopy and Imaging Research, Center for Research on Biological Systems,  
14 University of California, San Diego, School of Medicine, La Jolla, California, USA

15 <sup>5</sup> Department of Neurosciences, University of California, San Diego School of Medicine, La Jolla,  
16 California, USA

17 \*correspondence: [cstoneham@health.ucsd.edu](mailto:cstoneham@health.ucsd.edu), [jguatelli@health.ucsd.edu](mailto:jguatelli@health.ucsd.edu)

18 **Abstract**

19 The HIV-1 accessory protein Vpu modulates membrane protein trafficking and degradation to provide  
20 evasion of immune surveillance. Targets of Vpu include CD4, HLAs, and BST-2. Several cellular pathways  
21 co-opted by Vpu have been identified, but the picture of Vpu's itinerary and activities within membrane  
22 systems remains incomplete. Here, we used fusion proteins of Vpu and the enzyme ascorbate  
23 peroxidase (APEX2) to compare the ultrastructural locations and the proximal proteomes of wild type  
24 Vpu and Vpu-mutants. The proximity-omes of the proteins correlated with their ultrastructural locations  
25 and placed wild type Vpu near both retromer and ESCRT-0 complexes. Hierarchical clustering of protein  
26 abundances across the mutants was essential to interpreting the data and identified Vpu degradation-  
27 targets including CD4, HLA-C, and SEC12 as well as Vpu-cofactors including HGS, STAM, clathrin, and  
28 PTPN23, an ALIX-like protein. The Vpu-directed degradation of BST-2 required PTPN23 but not the  
29 retromer subunits. These data suggest that Vpu directs targets from sorting endosomes to degradation  
30 at multi-vesicular bodies via ESCRT-0 and PTPN23.

31 **Author Summary**

32 Vpu triggers the degradation or mis-localization of proteins important to the host's immune response.  
33 Vpu acts as an adaptor, linking cellular protein targets to the ubiquitination and membrane trafficking  
34 machinery. Vpu has been localized to various cellular membrane systems. By fusing wild type Vpu and  
35 Vpu-mutants to the enzyme ascorbate peroxidase, we defined the cellular proteome in proximity to Vpu  
36 and correlated this with the protein's location. We found that wild type Vpu is proximal to ESCRT  
37 proteins, retromer complexes, and sorting and late endosomal proteins. Functionally, we found that the  
38 Vpu-mediated degradation of the innate defense protein BST-2 required PTPN23, an ALIX-like protein,  
39 consistent with our observation of Vpu's presence at the limiting membranes of multi-vesicular bodies.

## 40 **Introduction**

41 HIV-1 encodes the accessory proteins Vif, Vpr, Nef, and Vpu to overcome cell-intrinsic, innate, and  
42 adaptive host defenses. Vpu is a small, non-enzymatic, integral membrane protein that functions as an  
43 adaptor, linking targeted cellular proteins to the protein quality control and membrane trafficking  
44 machinery to induce their re-localization or degradation. Cellular targets of Vpu interfere directly with  
45 viral replication or support immune surveillance; these targets include CD4 (the virus's primary  
46 receptor), BST-2 (an interferon-induced protein that traps newly assembled virions on the infected-cell  
47 surface), natural killer (NK) cell receptors (NTB-A), class I MHC (HLA-C), CCR7, and tetraspanins (1-7).

48 Several Vpu cofactors and co-opted pathways have been identified. These include a Skp1/cullin1/F-box  
49 (SCF) multi-subunit E3 ubiquitin ligase containing  $\beta$ -TrCP (8). A phospho-serine acidic cluster (PSAC) in  
50 the cytoplasmic domain (CD) of Vpu binds  $\beta$ -TrCP, recruiting the E3 ligase and inducing poly-  
51 ubiquitination of certain Vpu-interacting proteins such as CD4 and BST-2. For CD4, ubiquitination  
52 precedes extraction from the endoplasmic reticulum (ER) and ultimate degradation by the proteasome  
53 (9). Other Vpu targets, such as BST-2, are instead degraded within the endo-lysosomal system (10, 11).

54 Vpu-mediated antagonism of BST-2 involves a complex interplay of membrane transport steps. Vpu  
55 retains newly synthesized BST-2 in the *trans*-Golgi network (TGN), and it inhibits the recycling of  
56 endocytosed BST-2 to the plasma membrane (12, 13). The net down-regulation of BST-2 from the cell  
57 surface requires clathrin and partly depends on the hetero-tetrameric clathrin adaptor (AP) complexes 1  
58 and 2 (10, 14-16). An acidic leucine-based motif and the PSAC in Vpu's CD bind the AP complexes  
59 directly, enabling Vpu to redirect the endosomal transport of its targets independently of the SCF E3  
60 ubiquitin ligase (10, 15-18). Nonetheless, the endo-lysosomal degradation of BST-2 depends on Vpu's  
61 PSAC as well as the SCF E3 ligase, and on the ubiquitin-binding protein HRS (HGS), a subunit of the  
62 ESCRT-0 complex (19).

63 The multifaceted mechanism of Vpu-action is reflected in the protein's complex subcellular itinerary,  
64 which includes the ER, plasma membrane (PM), and various endosomal compartments. Consistent with  
65 this, microscopic data place Vpu at steady-state in the ER, Golgi and the TGN, the PM, and recycling  
66 endosomes (9, 20-22).

67 We asked whether a more integrated view of Vpu-activity could be obtained via a high-depth  
68 characterization of the protein's proximal proteome. Proximity-labeling covalently tags protein-  
69 neighbors in living cells with small molecules such as biotin, enabling isolation by affinity-purification  
70 and identification and quantitation by mass spectrometry. This approach enables the identification of  
71 physiologically relevant interactions even when they are weak or transient. In the present study, we  
72 expressed Vpu fused to the enzyme APEX2, an ascorbate peroxidase whose catalytic activities enable  
73 both electron microscopic localization as well as the labeling of proximal proteins with biotin (23). The  
74 biotinylated proteins were captured, identified, and quantified using tandem-mass-tag (TMT)-based  
75 proteomics. To correlate ultrastructural localization with proximal-proteins, we compared wild type Vpu  
76 to three Vpu-mutants: Vpu-A18H, a mutant of the Vpu transmembrane domain (TMD) that is retained in  
77 the ER; Vpu-AAA/F, a mutant of the alanine face of the Vpu TMD that interacts with the TMD of BST-2  
78 and other Vpu targets; and Vpu-S52,56N, a mutant of the key serines of the PSAC motif, which is unable  
79 to interact with either  $\beta$ -TrCP or the medium ( $\mu$ ) subunits of AP-1 and AP-2 and is partly displaced from  
80 juxtannuclear endosomes to the plasma membrane.

81 Through these comparisons, we characterized the proximal proteome and itinerary of Vpu, including  
82 changes in response to the above substitutions in Vpu whose consequences for protein-interaction and  
83 function are partly known. Our results place wild type Vpu at sorting endosomes, from which its targets  
84 can be diverted via ESCRT-related proteins toward the interior of multivesicular bodies for degradation.

85 The results generate hypotheses regarding potential Vpu targets, such as SEC12, and they identify  
86 PTPN23 as a novel cofactor of Vpu.

## 87 **Results**

### 88 **Vpu-APEX2 fusion is well expressed and functional.**

89 The enzyme ascorbate peroxidase 2 (APEX2) was genetically fused to the C-terminus of FLAG-tagged  
90 human codon-optimized clade B (NL4.3) Vpu (VpHu) with a short intervening linker sequence (Fig. 1A).  
91 APEX2 is modified for enhanced activity and improved detection sensitivity compared to its predecessor,  
92 APEX (23). Given the size of the tag (28 kDa) compared to that of Vpu (17 kDa), we first tested whether  
93 the fusion to APEX2 impaired Vpu activity. When transiently expressed in HeLa P4.R5 cells, which  
94 express the HIV receptors CD4, CXCR4, and CCR5 as well as BST-2, the Vpu(FLAG)-APEX2 fusions were  
95 well-expressed as measured by western blotting (Fig. 1B). Vpu-induced downregulation of surface BST-2  
96 and CD4 was measured by immunofluorescent staining and flow cytometry (Fig.1). APEX2-tagged Vpu  
97 retained biological activity against BST-2 and CD4, although it was slightly less active than Vpu tagged  
98 only with a C-terminal FLAG-epitope (Fig. 1C).

### 99 **Vpu-APEX2 distorts juxtannuclear endosomes and labels the limiting membranes of multi-vesicular 100 bodies (MVBs).**

101 APEX enables the generation of electron-dense material in fixed cells that can be detected by  
102 transmission electron microscopy (24). An advantage of APEX over horseradish peroxidase (HRP) is that  
103 it maintains activity in the reducing cytosolic environment. This allows APEX to be used for both  
104 intracellular protein imaging by electron microscopy and spatially resolved protein mapping (Martell,  
105 Deerinck et al. 2012).

106 The subcellular distribution of wild-type Vpu-APEX2 was first evaluated by electron microscopy (Fig. 2).  
107 HeLa cells were transiently-transfected to express Vpu-FLAG or Vpu-FLAG-APEX2. The next day, the cells  
108 were fixed and reacted with DAB in the presence of hydrogen peroxide (H<sub>2</sub>O<sub>2</sub>). After staining with  
109 osmium tetroxide, the polymerized DAB was visualized as a dark, electron-dense stain. This stain,  
110 corresponding to the location of Vpu-APEX, was observed on the cytoplasmic surface of vesiculated  
111 juxtannuclear membranes that appeared to be derived from the Golgi and endosomal systems (Fig. 2B).  
112 Most of these vesicles were unilamellar, enlarged vesicles (EVs), but some were consistent with multi-  
113 vesicular bodies (MVBs). The Vpu-APEX2 stain was restricted to the limiting membrane of MVBs and did  
114 not appear on intra-luminal vesicles. Vesiculated Golgi was observed in cells transfected with Vpu-FLAG  
115 (without the APEX2 tag; Fig. 2C). In contrast, in non-transfected HeLa P4.R5 cells, the Golgi appeared as  
116 a typical stack of flattened cisternae (Fig. 2D). These data are consistent with Vpu's known activities and  
117 residence in biosynthetic endo-lysosomal membranes (14, 15, 25, 26).

118 **Localization of Vpu-APEX2 mutants: Vpu-A18H mis-localizes to the ER; Vpu-S52,56N mis-localizes to**  
119 **the plasma membrane.**

120 We then compared the light and electron microscopic localization of Vpu-FLAG with Vpu-FLAG-APEX2  
121 when both constructs contained previously characterized mutations. We evaluated three Vpu-mutants:  
122 Vpu-A18H, a mutant of the Vpu transmembrane domain (TMD) that is retained in the ER (26); Vpu-  
123 AAA/F, a mutant of the alanine face of the Vpu TMD that interacts with the TMD of BST-2 and  
124 potentially other Vpu targets (27); and Vpu-S52,56N, a mutant of the key serines of the PSAC motif (8).  
125 HeLa P4.R5 cells transfected to express Vpu WT or the Vpu mutants tagged with FLAG were fixed and  
126 stained for the FLAG epitope and the *trans* Golgi resident marker protein TGN-46, then visualized by  
127 immunofluorescence microscopy (Fig. 3A). Vpu-FLAG localized to juxtannuclear membranes and  
128 overlapped partially with TGN-46, in agreement with previous studies (15, 20, 22). As anticipated, Vpu

129 A18H was restricted to the nuclear envelope and a cytoplasmic, ER-like distribution. The AAA/F mutation  
130 did not alter the localization of Vpu appreciably. In contrast, Vpu-S52,56N displayed a relatively more  
131 dispersed cytoplasmic staining.

132 Similar distributions were observed at the light microscopic level when Vpu-APEX2 and the mutants  
133 were visualized using H<sub>2</sub>O<sub>2</sub>, DAB, and osmium (Fig. 3B). The distribution of WT Vpu-APEX2 was juxta-  
134 and peri-nuclear, whereas Vpu-A18H-APEX2 was ER-like. In contrast, Vpu-S52,56-APEX2 outlined the cell  
135 perimeter, consistent with residence at the plasma membrane. Electron microscopic images (Fig. 3C)  
136 revealed vesiculation of juxtannuclear membranes by the AAA/F and S52,56N mutants as well as by the  
137 wild type Vpu-APEX2 (Fig. S1). Vpu-A18H-APEX2 stained the nuclear envelope and ER membranes and at  
138 high levels of expression induced a striking alteration in the structure of these organelles (Fig. S2). Vpu-  
139 S52,56N-APEX2 stained the plasma membrane, consistent with the light-microscopic observations.  
140 These data indicated that the subcellular distribution of Vpu-APEX2 was similar to that of Vpu without  
141 the APEX-tag. The data also indicated that specific mutations in Vpu-APEX2 modulated the protein's  
142 subcellular distribution in a manner consistent with known properties of Vpu.

### 143 **The Vpu-proximity-ome defined by multiplexed quantitative proteomics and comparison of Vpu** 144 **mutants.**

145 In living cells and in the presence of hydrogen-peroxide, APEX can catalyze the generation of biotin-  
146 phenoxy radicals to enable rapid, spatially restricted labeling of proximal proteins; these proteins can  
147 then be isolated by standard pull-down methods and identified by mass spectrometry. An advantage of  
148 APEX-based proximity labeling is that weak interactions can be identified, which would otherwise be lost  
149 during standard affinity purification. Moreover, neighboring proteins should be labeled and identified,  
150 even if they are not direct interactors. To evaluate the feasibility of this approach in the case of Vpu, we  
151 first detected proteins biotinylated by Vpu(FLAG)-APEX2 using immunofluorescence and immunoblot.

152 HeLa P4.R5 cells were transiently-transfected to express Vpu(FLAG)-APEX2 or the previously-  
153 characterized Mito-Matrix-APEX2 (23). The next day, the cells were incubated with hydrogen peroxide in  
154 the presence of biotin-phenol for 1 minute, fixed, and stained with streptavidin conjugated to the  
155 fluorescent label Alexa Fluor 594 (Fig. 4B). In cells transfected to express Vpu-APEX2, streptavidin was  
156 concentrated in perinuclear regions and overlapped with FLAG, consistent with biotinylation of proteins  
157 in close proximity to Vpu-APEX2, likely including Vpu-APEX2 itself. The streptavidin signal was also  
158 present faintly and diffusely throughout the nucleus and cytoplasm. In contrast, in cells transfected to  
159 express Mito-APEX2, streptavidin was restricted to mitochondrial structures without a diffuse  
160 background. This restriction presumably reflects the generation of biotin-phenoxy radicals within the  
161 enclosed membranes of mitochondria in the case of Mito-APEX2 rather than in the cytosol in the case of  
162 Vpu-APEX2. In a second set of experiments, cells expressing Vpu(FLAG)-APEX2 and related mutants, or  
163 expressing Mito-APEX2, were incubated with hydrogen peroxide in the presence of biotin-phenol for 1  
164 minute, lysed, and the proteins were separated by SDS-PAGE and analyzed by western blot. Biotinylated  
165 proteins were detected using streptavidin conjugated to HRP. The size distribution of proteins  
166 biotinylated by Vpu-APEX2 was strikingly different from that of Mito-APEX2, but the distribution of  
167 proteins biotinylated by WT Vpu-APEX2 and the related Vpu-mutants were indistinguishable. For the  
168 Vpu proteins, the most abundant band at 40 kDa likely corresponds to self-biotinylation of Vpu-APEX2.  
169 Minimal background biotin labeling was observed in cells transfected with empty plasmid (control) or  
170 Vpu(FLAG) lacking the APEX2 tag.

171 For our preliminary mass spectrometry experiments, we transfected HeLa P4.R5 cells to express the WT  
172 Vpu-APEX2, or the mutants, A18H, AAA/F, S52,56N, or the Mito-APEX2 control. The next day, the APEX2-  
173 catalyzed biotinylation procedures were performed, and biotinylated proteins were captured on  
174 streptavidin-coated beads. The captured proteins were eluted from the beads and analyzed by  
175 quantitative proteomics. Data were normalized as described in the Materials and Methods and are



176 presented as a heatmap of the relative abundance of 1779 common proteins identified in all samples  
177 (Fig. S3A). As anticipated, the Mito-APEX2 induced biotinylation of mitochondrial proteins, reflected in  
178 the high relative enrichment of proteins which conform to the Gene Ontology (GO) term “mitochondrial  
179 matrix” and other mitochondrion-associated cellular components (Fig. S3B, S3C).

180 In two subsequent independent experiments, the Vpu WT and mutants were compared for differential  
181 enrichment of biotinylated proteins that might represent potential cofactors or targets (Fig. 5 and Fig.  
182 6). The data were first compared by pair-wise analysis of Vpu WT vs. individual mutants (Fig. 5). Relaxed  
183 statistical parameters were used to compare the relative enrichment of proteins between Vpu WT and  
184 the mutants, as the fold changes were relatively low; data are presented as the relative protein  
185 enrichment in the presence of Vpu mutants and wild-type Vpu, with  $p$ -value determined by  $t$ -test. The  
186 proximity-ome of the A18H mutant was enriched for proteins derived from the biosynthetic pathway  
187 (such as SEC proteins) and COPII-coated vesicles, while depleted in plasma membrane and endosomal  
188 proteins relative to that of wild type Vpu. These data were consistent with the ultrastructural imaging,  
189 which demonstrated restriction of the A18H mutant to predominantly the ER and nuclear envelope. The  
190 AAA/F mutant, whose ultrastructural distribution was similar to that of the WT Vpu, had few proteins  
191 significantly enriched or depleted relative to the WT protein (data not shown). In contrast, the  
192 proximity-ome of the S52,56N mutant, which at the light and EM level was partially redistributed to the  
193 plasma membrane, was significantly enriched in plasma membrane proteins including EGFR and known  
194 targets of Vpu, (CD4, CD81, and HLA-C), while depleted in endosomal proteins relative to that of wild  
195 type Vpu.

196 K-means clustering analysis of the patterns of protein enrichment across the four conditions (WT Vpu  
197 and the three mutants) highlighted potential cofactors (cluster 6) and targets (cluster 5) for Vpu  
198 activities (Fig. 6.) Specifically, we reasoned that cluster 5 proteins, which were decreased relative to WT

199 when Vpu was retained in the ER by the A18H mutation but increased when Vpu was displaced to the  
200 plasma membrane by the S52,56N mutation, would include Vpu targets, especially if degraded by an  
201 ERAD-like mechanism. Consistent with this notion, cluster 5 includes known Vpu targets CD4, CD81,  
202 ICAM-1, and HLA proteins. We also reasoned that cluster 6 proteins, which were decreased by both the  
203 A18H mutation and the S52,56N mutation, could reflect the local intracellular environment of WT Vpu.  
204 Cluster 6 includes a variety of endosomal sorting proteins including the early endosomal protein EEA1,  
205 components of the ESCRT-0 complex (HGS, STAM, and STAM2), and components of the retromer  
206 complex (Vps35 and SNX3), among others. These data place wild type Vpu at the sorting endosome, a  
207 crossroads in the endosomal system at which Vpu is well-positioned to inhibit recycling and target  
208 proteins to endo-lysosomal degradation.

#### 209 **Potential novel Vpu targets.**

210 We reasoned that proteins enriched in proximity to Vpu-S52,56N relative to WT Vpu could also  
211 represent proteins that are stabilized when Vpu is mutated and might be targets of Vpu-mediated  
212 degradation. To distinguish such targets of Vpu-mediated degradation from proteins that instead reflect  
213 changes in the local environment of Vpu induced by the displacement of the S52,56N mutant to the  
214 plasma membrane, we first measured surface-downregulation using flow cytometry. HeLa P4.R5 cells  
215 were transfected to express Vpu-FLAG, and surface EGFR, CD55, and CD4 were measured (data not  
216 shown). CD4 was downregulated by Vpu as expected, but EGFR and CD55 were unaffected; these  
217 proteins likely become more proximal to Vpu when Vpu is displaced to the plasma membrane and are  
218 unlikely to be a degradation-targets.

219 To screen further for Vpu targets, we used the relatively high throughput Global Arrayed Protein  
220 Stability Analysis (GAPSA) assay (28). cDNAs encoding approximately 160 proteins that were significantly  
221 enriched in proximity to the S52,56N mutant relative to WT Vpu were screened for degradation by WT

222 Vpu, using Vpu-S52,56N as a control. We found eight proteins that were significantly degraded by WT  
223 Vpu but not by the S52,56N mutant (Fig. 7). Degradation of these proteins was confirmed by western  
224 blotting of the V5-tagged target proteins. Three of these proteins, CD4, HLA-C, and CD99, are known  
225 Vpu targets, but the others, including PREB/SEC12, are newly identified.

#### 226 **Potential novel Vpu cofactors.**

227 We reasoned that proteins enriched in proximity to WT Vpu relative to Vpu-S52,56N might represent  
228 cellular cofactors, as the DS<sub>52</sub>GxxS<sub>56</sub> sequence has been shown to be a relatively promiscuous motif with  
229 regard to recruiting both the SCF-E3 ligase and clathrin AP complexes (8, 16, 18). STRING analysis of  
230 proteins identified in k-means cluster 6, which includes proteins whose proximity to Vpu is decreased by  
231 the S52,56N substitution, revealed a network of interrelated proteins involved in ubiquitin sorting,  
232 endosomal trafficking, and retromer-mediated trafficking (Fig. 8A).

233 We investigated whether Vpu-FLAG colocalized with these proteins by immunofluorescence microscopy.  
234 HeLa P4.R5 cells were transfected to express Vpu-FLAG then fixed and stained for FLAG and either  
235 STAM, PTPN23, or Vps35; each colocalized with Vpu (Fig. 8B). We also observed partial colocalization  
236 between Vpu and the retromer protein SNX3 (Fig. S4).

237 To examine whether these proteins have roles in Vpu activities, we tested the ability of Vpu to degrade  
238 BST-2 in their absence. HeLa P4.R5 cells were depleted of STAM, Vps35, SNX3, or PTPN23 using siRNAs  
239 before transfection with proviral plasmids encoding either wild type HIV-1 clone NL4-3 (encoding Vpu)  
240 or NL4-3ΔVpu. Total cellular BST-2 was measured by western blotting 24 hours after transfection of the  
241 proviral plasmids (Fig. 8C). As expected, NL4-3 encoding Vpu reduced the levels of BST-2 compared to  
242 NL4-3ΔVpu in cells treated with the control siRNA (siNeg) (Fig. 8C). Knockdown of the ESCRT-0 subunit  
243 STAM markedly increased the steady-state levels of BST-2, but Vpu still reduced those levels.

244 Knockdown of PTPN23, an ALIX-like protein involved in the formation of intraluminal vesicles in MVBs

245 (29), inhibited the Vpu-mediated degradation of BST-2 without substantially affecting BST-2 levels in the  
246 absence of Vpu. Depletion of the retromer proteins Vps35 and SNX3 had minimal if any effect on Vpu-  
247 mediated degradation of BST-2. These data support distinct roles for ESCRT-0 and PTPN23 in the  
248 degradation of BST-2: whereas the ESCRT-0 protein STAM supported physiologic degradation of BST-2 in  
249 the absence of Vpu, PTP23N instead supported Vpu-mediated degradation specifically, consistent with  
250 activity as a Vpu cofactor.

## 251 **Discussion**

252 Proteomic methods have been used to explore host-HIV protein-protein interactions and to look broadly  
253 at changes in the plasma membrane induced by the virus (30, 31). Here, we used proximity labeling  
254 mediated by APEX2 fusion proteins as a novel approach to define the proteome proximal to the HIV-1  
255 protein Vpu, a membrane protein that mediates viral evasion of innate and adaptive immunity. The use  
256 of Vpu mutants whose subcellular localization differed was key to distinguishing proteins specific to the  
257 neighborhood of wild type Vpu from a large background. We observed that Vpu-APEX2 (like Vpu without  
258 the APEX2 fusion-tag) distorted juxtannuclear endosomes, replacing typical stacks of thin Golgi cisternae  
259 with enlarged vesicles. These vesicles, as well as the limiting membranes of MVBs, were labeled when  
260 cells expressing Vpu-APEX2 were visualized by thin section electron microscopy. When Vpu was  
261 mutationally trapped in the ER, its proximal proteome included an abundance of ER-associated proteins  
262 including components of COPII coats. When Vpu was mutationally displaced to the plasma membrane,  
263 its proximal proteome was depleted of early and sorting endosomal components; these included  
264 subunits of the retromer and the ESCRT-0 complexes, as well as the ALIX-like protein PTPN23, which  
265 supported the degradation of BST-2 by Vpu. Comparison of the proximal proteomes of the wild type and  
266 mutant Vpu proteins yielded a list of proteins up-regulated by substitution of the serines within the  
267 protein's PSAC motif. Some of these are likely proximity markers of the plasma membrane, consistent

268 with the Vpu mutant's change in localization, while others, including HLA-C, CD99, and SEC12, are  
269 potentially subject to Vpu-directed degradation, a possibility supported by the transient expression  
270 experiments herein.

271 Many proteins identified here are unlikely to be either Vpu targets or cofactors, but nonetheless  
272 contribute to creating a picture of Vpu's itinerary within cellular membranes. That itinerary seems  
273 focused on sorting endosomes identified by the specific presence of EEA1 and ESCRT-0 subunits in the  
274 neighborhood of wild type Vpu. However, it also likely includes late endosomes and MVBs, consistent  
275 with the presence of the ALIX-like protein PTPN23, which supports the budding of intraluminal vesicles  
276 into MVBs (29). This characterization of Vpu is reinforced by the labeling of the limiting membranes of  
277 MVBs by wild type Vpu-APEX2 when the enzyme is used to generate an osmiophilic reaction product.

278 PTPN23 is required for the sorting of EGFR into MVBs and its ultimate degradation (32). Consistent with  
279 this, functional data herein indicate that PTPN23 is a cofactor of Vpu on the path of endo-lysosomal  
280 degradation of at least one of its targets, BST-2. Whether PTPN23 directly interacts with Vpu remains an  
281 open question. Nonetheless, PTPN23 does not seem required for the physiologic degradation of BST-2,  
282 suggesting that it defines a distinct pathway of degradation co-opted by Vpu. Although not found in the  
283 heatmap of Figure 6 (see Supplemental Table 2), the PTPN23-associated protein CHMP 4B and the  
284 deubiquitinase USP8/UBPY co-clustered with PTPN23 and STAM in the independent experiments shown  
285 in supplemental figure S2 (see Supplemental Table 1)(32). These data are consistent with a model in  
286 which Vpu co-opts ESCRT-0, PTPN23, and CHMP 4B to direct targets into the lumen of MVBs for  
287 degradation.

288 The ESCRT-0 components HRS and STAM were identified as proximal to wild type Vpu, but in contrast to  
289 PTPN23, knockdown of STAM markedly increased the expression of BST-2 in either the absence or  
290 presence of Vpu. This suggests that ESCRT-0, which plays a key role in the sorting of ubiquitinated

291 membrane proteins from early endosomes to late endosomes at the expense of recycling to the plasma  
292 membrane (33), constitutively targets BST-2 toward endo-lysosomal degradation. Vpu presumably acts  
293 downstream of that step, since it can stimulate partial degradation of BST-2 even when the expression  
294 of BST-2 is increased by knockdown of STAM.

295 Although our primary intention was not to look for new Vpu-targets, our data suggest several novel  
296 targets of serine-dependent Vpu-mediated degradation. One of the more intriguing is PREB, also known  
297 as SEC12, a guanine nucleotide exchange factor for the GTPase Sar1p (34), which regulates the  
298 formation of COPII coats and ER-to-Golgi transport. Degradation of SEC12 by Vpu, shown here in  
299 transient expression experiments, could cause a block in ER-to-Golgi transport and is potentially  
300 consistent with the reported inhibition of exocytic membrane trafficking by Vpu (12, 35). Although it  
301 might also be consistent with the formation of the large juxtanuclear endosomes observed electron  
302 microscopically, those structures were not serine-dependent (Fig. S1). On the other hand, cells  
303 expressing the ER-restricted Vpu-A18H mutant often showed exuberant accumulation of ER membranes  
304 emanating from the nuclear envelope, potentially consistent with an exaggerated SEC12 degradation  
305 phenotype and a block in ER-to-Golgi transport (Fig. S2).

306 In summary, correlative microscopic and proteomic analyses have provided a view of the Vpu-proximal  
307 proteins with unprecedented depth. The data place wild type Vpu predominantly at early sorting  
308 endosomes as well as at late endosomes and MVBs. The data generate new models, including the role of  
309 PTPN23 in degradation directed by Vpu at the MVB and the possibility that Vpu-mediated degradation  
310 of SEC12 underlies inhibition of exocytic trafficking. Elaborating these new models will require viral  
311 expression of Vpu in natural host cells such as CD4-positive T cells or macrophages.

## 312 **Materials and Methods**

313 **Cells:** HeLa P4.R5 cells, which express the HIV-1 receptors CD4 and CCR5, were obtained from the NIH  
314 AIDS Research and Reference Reagent program from Dr. Nathaniel Landau (36). HEK293 cells were  
315 obtained from Dr. Saswati Chatterjee (City of Hope). HEK293T cells (used in GAPSA assays) were  
316 purchased from ATCC (Manassas, VA). All cell lines were maintained in Dulbecco's modified Eagle  
317 medium (DMEM) supplemented with 10% fetal bovine serum (FBS), penicillin/streptomycin, and 1  
318  $\mu\text{g}/\text{mL}$  puromycin in the case of HeLa P4.R5 cells.

319 **Plasmids:** The C-terminally FLAG-tagged human codon-optimized clade B (NL4.3) Vpu (VpHu) has been  
320 previously described (17). The pCG-GFP reporter plasmid (37) was provided by Dr. Jacek Skowronski,  
321 Case Western Reserve University, Cleveland, OH. pcDNA3.1-Connexin43-GFP-APEX2 construct was  
322 obtained from Addgene, deposited by Dr. Alice Ting, Massachusetts Institute of Technology, Cambridge,  
323 MA (23). The pcDNA3.1-based Vpu-FLAG-APEX2 was generated by overlap extension PCR amplification  
324 before restriction digest and ligation into the pcDNA3.1(-) plasmid backbone between NheI and EcoRI  
325 sites. Vpu-FLAG-containing fragment was amplified using 5' AGATTCGCTAGCATGGTGCCATTATTGTCGC  
326 and 5' CACAGTTGGGTAAGACTTCCGGAGCCGCCCTTATCGTCGTCATCCTTGTA primers, and FLAG-  
327 APEX2 was amplified using 5'  
328 TTACAAGGATGACGACGATAAGGGCGGCGCTCCGGAAAGTCTTACCCAAGTGTG and 5'  
329 TGCTTAGAATTCTTAGGCATCAGCAAACCAAG. Vpu-FLAG plasmid constructs encoding the mutations  
330 AAA/F, A18H and S52,56N were previously generated. The overlap extension PCR method was used to  
331 amplify and ligate these mutated DNAs into the pcDNA3.1(-) backbone with a C-terminal APEX2 tag. The  
332 Mito matrix-v5-APEX2 construct was generated in the Ting lab (23). Expression plasmids containing V5-  
333 tagged cDNAs in the pLX304 backbone were obtained from the Lenti ORFeome Collection (38). A  
334 pcDNA4-Vpu-FLAG plasmid was used for the GAPSA assay; LacZ-FLAG was used as a control (28).

335 pcDNA4-Vpu-S52,56N-FLAG was generated by G-block synthesis (Integrated DNA Technologies, IDT) and  
336 ligation between BamHI and NotI sites of the pcDNA4 backbone, using In-fusion cloning reagent (Takara  
337 Bio). Full-length HIV-1 and HIV-1 lacking Vpu were expressed from the HIV-1 proviral plasmid pNL4-3  
338 (39) and pNL4-3 $\Delta$ Vpu (40).

339 **siRNAs:** The siRNAs targeting STAM and Vps35 were custom synthesized by Sigma-Aldrich, the target  
340 sequences were as follows; STAM: UAACUUGGUAUAUAAGGAAAGGGCC, and Vps35:  
341 GCCUUCAGAGGAUGUUGUAUCUUUA. An siRNA targeting SNX3 was acquired from Dharmacon, target  
342 sequence: CGUGACUAUUAUGAUUGA. A validated siRNA targeting PTPN23 was purchased from  
343 Thermo Fisher Scientific (s24775). The AllStars negative control siRNA was used as a non-specific control  
344 (Qiagen).

345 **Transfections:**

346 **Plasmids:** Cells were transfected 24 hours after plating, using Lipofectamine 2000, following the  
347 manufacturer's protocol (Invitrogen). Lipofectamine 2000 was diluted in Opti-MEM (Gibco) and  
348 incubated for 5 minutes at RT prior to mixing with DNA diluted in Opti-MEM. The DNA:Lipofectamine  
349 mix was incubated for 20 minutes prior to addition to cells in antibiotic-free media. The cells were  
350 incubated with the transfection mix for 4 hours before the media was replaced.

351 **siRNAs:** Cells were reverse-transfected (transfected while plating) in 6-well plates ( $3.5 - 5 \times 10^5$  cells per  
352 well) using Lipofectamine RNAimax transfection reagent (Invitrogen), following standard protocols. The  
353 siRNAs were diluted in Opti-MEM, and added to wells containing cells in antibiotic-free media at a 10  
354 nM final concentration. Assays were performed 48 or 72 hours post-transfection with siRNAs, as  
355 indicated in figure legends.



356 **Flow Cytometry:** To quantify cell-surface levels of CD4 and BST-2, HeLa cells transfected to express Vpu  
357 constructs or empty plasmid control, and the pCG-GFP transfection marker, were washed with 1X  
358 phosphate-buffered saline (PBS) and resuspended using Acutase dissociation media (Innovative Cell  
359 Technologies). The cells were collected and pelleted by centrifugation at 300 x g for 5 minutes, then  
360 resuspended in 100  $\mu$ L flow cytometry buffer (2% FBS in PBS, and 0.1% sodium azide) and stained using  
361 either Alexa-647-conjugated mouse anti-BST-2 antibody, Alexa-647-IgG isotype control, APC-conjugated  
362 mouse anti-CD4, or APC-conjugated mouse IgG1 isotype control (BioLegend), and incubated for 30  
363 minutes on ice. The cells were washed and pelleted three times before fixation in 2% paraformaldehyde  
364 (PFA) in 1X PBS for 15 minutes. Surface BST-2 or CD4 was quantified using a BD Accuri C6 flow cytometer  
365 and CFlow Sampler analysis software. Data are presented as mean fluorescence intensity of FL4 (far-red)  
366 signal in the GFP-positive (FL1) cell population.

367 **Immunofluorescence Microscopy:**  $1.2 \times 10^5$  HeLa P4.R5 cells were seeded on 12 mm coverslips in 24-  
368 well plates 24 hours prior to transfection. Cells were transfected with 200 ng DNA using Lipofectamine  
369 2000, following the manufacturer's protocol. The cells were fixed and stained the following day. The  
370 cells were washed in cold PBS and fixed in 4% PFA in PBS on ice for 5 minutes, then 15 minutes at room  
371 temperature (RT). The cells were washed twice with PBS and PFA was quenched with 50 mM  
372 ammonium chloride for 5 minutes. The cells were permeabilized with 0.2% Triton X-100 in 1X PBS for 7  
373 minutes and blocked with 2% bovine serum albumin (BSA) for 30 minutes at RT prior to incubation with  
374 primary antibodies for 2 hours at RT. Vpu was detected with mouse anti-FLAG (Sigma-Aldrich); the *trans*-  
375 Golgi was detected with goat anti-TGN46 (ABD Serotec); Mito-V5-APEX2 was detected using mouse anti-  
376 V5 (Invitrogen); biotin was detected with Alexa-594-conjugated Streptavidin (Invitrogen). Endogenous  
377 protein cofactors were detected using rabbit anti-STAM antibody (ProteinTech), rabbit anti-PTPN23  
378 (ProteinTech) goat anti-Vps35 (Novus Bio) and rabbit anti-SNX3 (Abcam).

379 The cells were washed and stained with donkey anti-mouse rhodamine-X (RhX) or donkey anti-sheep  
380 AlexaFluor-488 (Jackson ImmunoResearch) for 1 hour at RT. For detection of APEX2 biotinylation by  
381 immunofluorescence, the cells were incubated with 500  $\mu$ M biotinyl-tyramide in pre-warmed medium  
382 for 30 minutes prior to addition of hydrogen peroxide (1 mM). The cells were incubated for 1 minute  
383 prior to quenching with APEX2 quencher solution (see below), and washing 3x with PBS before fixation  
384 and staining as above. Stretavidin conjugated to Alexa-Fluor 594 was used to detect biotinylated  
385 proteins. Following immunostaining, the cells were washed extensively in PBS, and briefly in water,  
386 before mounting in Mowiol (polyvinyl alcohol) mounting medium (prepared in-house).

387 Images were captured at 100x magnification (1344  $\times$  1024 pixels) using an Olympus IX81 wide-field  
388 microscope fitted with a Hamamatsu CCD camera. For each field, a Z-series of images was collected,  
389 deconvolved using a nearest-neighbor algorithm (Slidebook software v6, Imaging Innovations, Inc) and  
390 presented as Z-stack projections. Image insets displaying colocalization are single Z-plane images. Image  
391 brightness was adjusted using Adobe Photoshop CS3.

392 **Transmission Electron Microscopy:** 6  $\times$  10<sup>5</sup> HeLa P4.R5 cells were seeded in 35 mm poly-lysine-coated  
393 MatTek dishes and transfected 24 hours later with 1  $\mu$ g total pcDNA3.1-VpHu-FLAG-APEX2 or pcDNA3.1-  
394 VpHu-S52,56N-FLAG-APEX2. 16 hours later, the cells were fixed in 2% glutaraldehyde (Electron  
395 Microscopy Sciences) in 100 mM sodium cacodylate with 2 mM CaCl<sub>2</sub>, pH 7.4, for 60 minutes on ice. All  
396 subsequent steps were performed on ice until resin infiltration. The cells were rinsed with 100 mM  
397 sodium cacodylate with 2 mM CaCl<sub>2</sub> five times for two minutes before addition of 20 mM glycine 100  
398 mM sodium cacodylate with 2 mM CaCl<sub>2</sub> to quench unreacted fixative. The cells were washed with 100  
399 mM sodium cacodylate with 2 mM CaCl<sub>2</sub> and diaminobenzidine (DAB) staining was initiated with the  
400 addition of freshly diluted 0.5 mg/mL DAB (Sigma; from a stock of the free base dissolved in 0.1 M HCl)  
401 and 0.03% H<sub>2</sub>O<sub>2</sub> in 100 mM sodium cacodylate with 2 mM CaCl<sub>2</sub>. After 5 minutes, the reaction was

402 stopped with the removal of the DAB solution, and the cells were again washed with 100 mM sodium  
403 cacodylate with 2 mM CaCl<sub>2</sub>. Post-fixation staining was performed with 2% (w/v) osmium tetroxide  
404 (Electron Microscopy Sciences) for 30 minutes in chilled buffer. Cells were rinsed 5× 2 minutes each in  
405 chilled distilled water and then placed in chilled 2% (w/v) uranyl acetate in ddH<sub>2</sub>O (Electron Microscopy  
406 Sciences) overnight. Cells were washed in distilled water, and dehydrated in graded ethanol series (20%,  
407 50%, 75%, 90%, 95%, 100%, 100%, 100%), for 2 minutes each. The cells were brought to RT in 100%  
408 ethanol, and infiltrated with Durcupan ACM resin (Sigma-Aldrich) diluted in ethanol 1:1 for one hour.  
409 The cells were then infiltrated with 100% resin twice for one hour each before curing at 60°C for 48  
410 hours. DAB positive cells were identified at low resolution by wide-field microscopy. 70-90 nm-thin  
411 sections were imaged using FEI-Tecnaï G2 Spirit or JEOL 1200EX transmission electron microscopes  
412 operating at 80kV. Sample processing and imaging by electron microscopy was performed at the  
413 National Center for Microscopy and Imaging Research at UC San Diego.

414 **Western Blot:** Cell monolayers were washed 3 times in ice-cold PBS and lysed in extraction buffer (0.5%  
415 Triton X-100, 150 mM NaCl, 25 mM KCl, 25 mM Tris, pH 7.4, 1 mM EDTA) supplemented with a protease  
416 inhibitor mixture (Roche Applied Science). Extracts were clarified by centrifugation (12,000 × g for 10  
417 minutes at 4°C). The sample protein concentration was determined by Bradford assay (BD Biosciences)  
418 using standard protocols, and 10 µg denatured by boiling for 5 minutes in SDS sample buffer. Proteins in  
419 the extracts were resolved by SDS-PAGE using 12% or 4-15% gradient (BioRad) acrylamide gels,  
420 transferred to PVDF membranes, and probed by immunoblotting using mouse anti-Actin (Sigma-  
421 Aldrich), mouse anti-FLAG (Sigma-Aldrich), mouse anti-V5 (Invitrogen), STAM (ProteinTech), Vps35  
422 (Novus Bio), SNX3 (Abcam), PTPN23 (ProteinTech), and horseradish peroxidase-conjugated goat anti-  
423 Mouse IgG (BioRad) or HRP-donkey anti-Rabbit IgG (BioRad) and Western Clarity detection reagent  
424 (BioRad). Apparent molecular mass was estimated using commercial protein standards (PageRulePlus,

425 Thermo Scientific). Chemiluminescence was detected using a BioRad Chemi Doc imaging system and  
426 analyzed using BioRad Image Lab v5.1 software.

427 **Protein Biotinylation:** HeLa P4.R5 cells were plated in 10 cm dishes at  $3.2 \times 10^6$  cells per dish. The  
428 following day, the cells were transfected with 12  $\mu$ g plasmid DNA using Lipofectamine 2000  
429 (Invitrogen/Thermo Fisher), following manufacturer's guidelines. Biotinylation and protein harvest was  
430 performed 24 hours later, following established protocol (41). The cells were incubated with 500  $\mu$ M  
431 biotinylation-tyramide in pre-warmed complete DMEM for 30 minutes at 37 °C. The biotinylation reaction  
432 was catalyzed by addition of 1 mM hydrogen peroxide to the culture media for 1 minute before  
433 quenching three times with APEX2 quenching solution (10 mM sodium ascorbate, 5 mM Trolox, and 10  
434 mM sodium azide in 1 X PBS). The cells were scraped from the dishes with the final quencher wash into  
435 15 mL Falcon tubes and pelleted by centrifugation at 300 x g for 5 minutes at 4°C. The cell pellets were  
436 lysed in 1ml RIPA buffer containing quenching components and protease inhibitor cocktail (41) for 5  
437 minutes on ice. The lysates were briefly vortexed and nuclei pelleted by centrifugation at 15,000 x g for  
438 10 minutes at 4°C. Protein content from the supernate was measured by Bradford protein assay  
439 (BioRad) and equal amounts incubated with streptavidin beads at 4°C overnight, while gently agitated.  
440 The following day, the beads were washed 2x with RIPA lysis buffer, and 1x with 2 M urea in 10 mM Tris-  
441 HCl (pH 8). The beads were washed again with RIPA lysis buffer, 2 x 1x PBS, and protein eluted from the  
442 beads in excess Biotin (200 mM NaCl, 50 mM Tris-HCl (pH 8), 2% SDS, 1 mM D-Biotin) at 70 °C for 30  
443 minutes. An aliquot was stored for Western blot analysis, and remaining eluate processed for mass  
444 spectrometric analysis.

445 **Quantitative Mass Spectrometry:** Quantitative MS analysis was performed as previously described (42)  
446 in the Collaborative Center for Multiplexed Proteomics in the Department of Pharmacology and the  
447 Skaggs School of Pharmacy and Pharmaceutical Sciences at UC San Diego. All quantitative mass

448 spectrometry experiments were performed in biological duplicate. Protein disulfides were reduced with  
449 5 mM DTT at 56°C for 30 minutes. Proteins were cooled on ice and alkylated with 15 mM iodoacetamide  
450 for 20 minutes at RT. Reduced/alkylated proteins were precipitated by addition of trichloroacetic acid  
451 (TCA) on ice for 10 min. Precipitated proteins were pelleted by centrifugation at 14,000 rpm for 5min,  
452 the supernatant was removed, protein resuspended in cold acetone, pelleted, and acetone wash  
453 repeated. Precipitated proteins were re-suspended in 1 M urea in 50 mM HEPES, pH 8.5 for proteolytic  
454 digestion. Proteins were first digested with LysC overnight at room temperature, then with trypsin for 6  
455 hours at 37°C. Digestion was quenched by the addition of 10% trifluoroacetic acid (TFA), and peptides  
456 were desalted with C18 solid-phase extraction columns. Peptides were dried in a speed-vacuum  
457 concentrator, then re-suspended in 50% Acetonitrile/5% formic acid and quantified by BCA assay. A 50  
458 µg aliquot was made for each sample for proteomic analysis. Protein samples were labeled with  
459 TMT10plex isobaric mass tag labeling reagents (Thermo Scientific), at a concentration of 20 µg/µL in dry  
460 acetonitrile. Lyophilized peptides were re-suspended in 50 µL 30% acetonitrile in 200 mM HEPES, pH 8.5  
461 and 8 µL of the appropriate TMT reagent was added to each sample. The labeling reaction was  
462 conducted for 1 hour at RT, and then quenched by the addition of 9 µL of 5% hydroxylamine for 15  
463 minutes at RT. Labeled samples were then acidified by adding 50 µL of 1% TFA. Differentially labeled  
464 samples were pooled into multiplex experiments and then desalted via solid-phase extraction.  
465 Combined multiplexes were lyophilized and re-suspended in 5% formic acid/5% acetonitrile for  
466 identification and quantification by LC-MS2/MS3. All LC-MS2/MS3 experiments were performed on an  
467 Orbitrap Fusion mass spectrometer with an in-line Easy-nLC 1000 with chilled autosampler. Peptides  
468 were eluted with a linear gradient from 11 to 30% acetonitrile in 0.125% formic acid over 165 minutes at  
469 a flow rate of 300 nL/minute and heating the column to 60°C. Electrospray ionization was achieved by  
470 applying 2000V through a stainless-steel T-junction at the inlet of the column. Data were processed  
471 using the ProteomeDiscoverer 2.1.0.81 software package. Data were normalized as detailed previously

472 (42). The data from the proteomic experiments have been uploaded to ProteomeXchange (PXD023713)  
473 through MassIVE (MSV000086733).

474 **Global Arrayed Protein Stability Analysis (GAPSA):** The GAPSA assay was performed as previously  
475 described (28). cDNA clones for approximately 160 genes were isolated from the Human ORFeome V8.1  
476 Collection (Broad Institute). cDNA concentrations were normalized to 10 ng/ $\mu$ L prior to spotting in poly-  
477 D-lysine-coated 384 well plates. 20 ng cDNA encoding Vpu-FLAG, Vpu-S52,56N-FLAG or LacZ-FLAG  
478 control diluted in Opti-MEM was added to each well. Fugene6 (Promega) transfection reagent was  
479 added and incubated for 25 minutes at room temperature. 20  $\mu$ L DMEM containing  $6 \times 10^4$  HEK293T  
480 cells was added to each well and subsequently incubated for 48 hours at 37°C, 5 % CO<sub>2</sub>. The cells were  
481 stained using an automated protocol. First, the plates were washed with PBS and cells fixed in 8%  
482 paraformaldehyde for 1 hour at room temperature. The cells were then washed with PBS, and  
483 permeabilized with 0.5% Triton X-100 in PBS for 10 minutes at room temperature. The cells were then  
484 washed with PBS and incubated with 6% BSA in PBS for 1 hour at room temperature to block non-  
485 specific antigen binding. The cells were then washed with PBS and incubated with mouse anti-V5 and  
486 rabbit anti-FLAG antibodies (1:250) in BSA-PBS for 1 hour at room temperature. The cells then were  
487 washed with PBS and incubated with goat anti-mouse Alexa 488, and goat anti-rabbit Alexa 568 (1:250  
488 dilution) in BSA-PBS for 1 hour at room temperature. Nuclei were then stained with 2  $\mu$ g/mL DAPI. The  
489 plates were imaged using the Opera QEHS High-Content Imaging System. The image output was  
490 analyzed using the Acapella High-Content Image Analysis Software (PerkinElmer) using a custom script.  
491 Data analysis was done as previously described (28).

492 **Data presentation and statistics.** Figures were prepared using Adobe Creative Suite CS3;  
493 immunofluorescence images were adjusted using Adobe Photoshop and figures prepared using Adobe  
494 Illustrator software. Statistical analyses were performed using Graphpad Prism v5. Mass spectrometry

495 data was analyzed using Microsoft excel 2016 and R Studio (R v.4.0.3). Significance for proteomics data  
496 was assessed by Student's *t*-test; variance was assessed by an F-test to ensure the correct statistical  
497 assumptions were used. *p* values of  $p \leq 0.05$  were considered significant. Heatmaps were generated  
498 using Morpheus matrix visualization software (Broad institute,  
499 <https://software.broadinstitute.org/morpheus>); data were sorted by k-means clustering, the optimal  
500 number of gene clusters was determined by elbow estimation method. Gene Ontology (GO) analysis was  
501 performed using the Database for Annotation, Visualization and Integrated Discovery (DAVID) v6.8 (43,  
502 44). Network analysis of protein subset k-means cluster 6 was performed using the STRING app for  
503 Cytoscape (v3.7.0) (45, 46).

#### 504 **Acknowledgements**

505 We thank Klaus Strebel for the original codon-optimized VpHu construct and pNL4-3ΔVpu; Alice Ting for  
506 APEX-related constructs; the NIH AIDS Reagent Program; and The Pendleton Charitable Trust. The work  
507 was supported by NIH grants R37AI081668 to JCG, R01 AI124843 and R01 AI127302 to SKC, and in part  
508 by UC San Diego Center for AIDS Research Developmental Awards to CAS, LP, and DG; an NIH-funded  
509 program (P30 AI036214). SL was supported by a research fellowship of the Deutsche  
510 Forschungsgemeinschaft (DFG) (Grant reference number 404687549). JMW was supported by NIH T32  
511 GM007752 and T32 AR064194, JL was supported by NIH K12 GM06852.

#### 512 **Competing interests**

513 The authors have no financial or non-financial competing interests.

#### 514 **Supplementary Materials**

515 [Figure S1: Juxtannuclear endosomal distortion in cells expressing Vpu-S52,56N-APEX2.](#)

516 [Figure S2: Exuberant ER membranes in cells expressing Vpu-A18H-APEX2](#)

- 517 [Figure S3: Pair-wise comparison of proximity-ome of Vpu-APEX2 compared to the Mito-APEX2.](#)
- 518 [Figure S4: Immunofluorescence microscopy of Vpu-FLAG and candidate cofactor SNX3](#)
- 519 [Table S1: Mass Spectrometry Experiment 1: Comparison of Mito Matrix and Vpu WT and mutants](#)
- 520 [Table S2: Mass Spectrometry Experiment 2 and 3: Comparison of Vpu WT and mutants](#)
- 521 [Table S3: Gene Ontology network analysis of differentially-enriched Vpu-proximal protein subsets](#)



522 **References**

- 523 1. Van Damme N, Goff D, Katsura C, Jorgenson RL, Mitchell R, Johnson MC, et al. The interferon-  
524 induced protein BST-2 restricts HIV-1 release and is downregulated from the cell surface by the viral Vpu  
525 protein. *Cell host & microbe*. 2008;3(4):245-52.
- 526 2. Neil SJ, Zang T, Bieniasz PD. Tetherin inhibits retrovirus release and is antagonized by HIV-1 Vpu.  
527 *Nature*. 2008;451(7177):425-30.
- 528 3. Lambele M, Koppensteiner H, Symeonides M, Roy NH, Chan J, Schindler M, et al. Vpu is the main  
529 determinant for tetraspanin downregulation in HIV-1-infected cells. *J Virol*. 2015;89(6):3247-55.
- 530 4. Willey RL, Maldarelli F, Martin MA, Strebel K. Human immunodeficiency virus type 1 Vpu protein  
531 induces rapid degradation of CD4. *Journal of virology*. 1992;66(12):7193-200.
- 532 5. Shah AH, Sowrirajan B, Davis ZB, Ward JP, Campbell EM, Planelles V, et al. Degranulation of  
533 natural killer cells following interaction with HIV-1-infected cells is hindered by downmodulation of NTB-  
534 A by Vpu. *Cell host & microbe*. 2010;8(5):397-409.
- 535 6. Ramirez PW, Famiglietti M, Sowrirajan B, DePaula-Silva AB, Rodesch C, Barker E, et al.  
536 Downmodulation of CCR7 by HIV-1 Vpu results in impaired migration and chemotactic signaling within  
537 CD4(+) T cells. *Cell reports*. 2014;7(6):2019-30.
- 538 7. Apps R, Del Prete GQ, Chatterjee P, Lara A, Brumme ZL, Brockman MA, et al. HIV-1 Vpu Mediates  
539 HLA-C Downregulation. *Cell Host Microbe*. 2016;19(5):686-95.
- 540 8. Margottin F, Bour SP, Durand H, Selig L, Benichou S, Richard V, et al. A novel human WD protein,  
541 h-beta TrCp, that interacts with HIV-1 Vpu connects CD4 to the ER degradation pathway through an F-  
542 box motif. *Molecular cell*. 1998;1(4):565-74.

- 543 9. Magadan JG, Perez-Victoria FJ, Sougrat R, Ye Y, Strebel K, Bonifacino JS. Multilayered mechanism  
544 of CD4 downregulation by HIV-1 Vpu involving distinct ER retention and ERAD targeting steps. *PLoS*  
545 *pathogens*. 2010;6(4):e1000869.
- 546 10. Mitchell RS, Katsura C, Skasko MA, Fitzpatrick K, Lau D, Ruiz A, et al. Vpu antagonizes BST-2-  
547 mediated restriction of HIV-1 release via beta-TrCP and endo-lysosomal trafficking. *PLoS pathogens*.  
548 2009;5(5):e1000450.
- 549 11. Douglas JL, Viswanathan K, McCarroll MN, Gustin JK, Fruh K, Moses AV. Vpu directs the  
550 degradation of the human immunodeficiency virus restriction factor BST-2/Tetherin via a {beta}TrCP-  
551 dependent mechanism. *Journal of virology*. 2009;83(16):7931-47.
- 552 12. Schmidt S, Fritz JV, Bitzegeio J, Fackler OT, Keppler OT. HIV-1 Vpu blocks recycling and  
553 biosynthetic transport of the intrinsic immunity factor CD317/tetherin to overcome the virion release  
554 restriction. *mBio*. 2011;2(3):e00036-11.
- 555 13. Dube M, Roy BB, Guiot-Guillain P, Binette J, Mercier J, Chiasson A, et al. Antagonism of tetherin  
556 restriction of HIV-1 release by Vpu involves binding and sequestration of the restriction factor in a  
557 perinuclear compartment. *PLoS pathogens*. 2010;6(4):e1000856.
- 558 14. Lau D, Kwan W, Guatelli J. Role of the endocytic pathway in the counteraction of BST-2 by  
559 human lentiviral pathogens. *Journal of virology*. 2011;85(19):9834-46.
- 560 15. Kueck T, Neil SJ. A cytoplasmic tail determinant in HIV-1 Vpu mediates targeting of tetherin for  
561 endosomal degradation and counteracts interferon-induced restriction. *PLoS pathogens*.  
562 2012;8(3):e1002609.

- 563 16. Stoneham CA, Singh R, Jia X, Xiong Y, Guatelli J. Endocytic Activity of HIV-1 Vpu: Phosphoserine-  
564 dependent Interactions with Clathrin Adaptors. *Traffic*. 2017.
- 565 17. Jia X, Weber E, Tokarev A, Lewinski M, Rizk M, Suarez M, et al. Structural basis of HIV-1 Vpu-  
566 mediated BST2 antagonism via hijacking of the clathrin adaptor protein complex 1. *eLife*.  
567 2014;3:e02362.
- 568 18. Kueck T, Foster TL, Weinelt J, Sumner JC, Pickering S, Neil SJ. Serine Phosphorylation of HIV-1  
569 Vpu and Its Binding to Tetherin Regulates Interaction with Clathrin Adaptors. *PLoS pathogens*.  
570 2015;11(8):e1005141.
- 571 19. Janvier K, Pelchen-Matthews A, Renaud JB, Caillet M, Marsh M, Berlioz-Torrent C. The ESCRT-0  
572 component HRS is required for HIV-1 Vpu-mediated BST-2/tetherin down-regulation. *PLoS Pathog*.  
573 2011;7(2):e1001265.
- 574 20. Van Damme N, Guatelli J. HIV-1 Vpu inhibits accumulation of the envelope glycoprotein within  
575 clathrin-coated, Gag-containing endosomes. *Cell Microbiol*. 2008;10(5):1040-57.
- 576 21. Varthakavi V, Smith RM, Martin KL, Derdowski A, Lapierre LA, Goldenring JR, et al. The  
577 pericentriolar recycling endosome plays a key role in Vpu-mediated enhancement of HIV-1 particle  
578 release. *Traffic*. 2006;7(3):298-307.
- 579 22. Dube M, Roy BB, Guiot-Guillain P, Mercier J, Binette J, Leung G, et al. Suppression of Tetherin-  
580 restricting activity upon human immunodeficiency virus type 1 particle release correlates with  
581 localization of Vpu in the trans-Golgi network. *Journal of virology*. 2009;83(9):4574-90.
- 582 23. Lam SS, Martell JD, Kamer KJ, Deerinck TJ, Ellisman MH, Mootha VK, et al. Directed evolution of  
583 APEX2 for electron microscopy and proximity labeling. *Nat Methods*. 2015;12(1):51-4.

- 584 24. Martell JD, Deerinck TJ, Sancak Y, Poulos TL, Mootha VK, Sosinsky GE, et al. Engineered  
585 ascorbate peroxidase as a genetically encoded reporter for electron microscopy. *Nature biotechnology*.  
586 2012;30(11):1143-8.
- 587 25. Hauser H, Lopez LA, Yang SJ, Oldenburg JE, Exline CM, Guatelli JC, et al. HIV-1 Vpu and HIV-2 Env  
588 counteract BST-2/tetherin by sequestration in a perinuclear compartment. *Retrovirology*. 2010;7:51.
- 589 26. Skasko M, Tokarev A, Chen CC, Fischer WB, Pillai SK, Guatelli J. BST-2 is rapidly down-regulated  
590 from the cell surface by the HIV-1 protein Vpu: evidence for a post-ER mechanism of Vpu-action.  
591 *Virology*. 2011;411(1):65-77.
- 592 27. Skasko M, Wang Y, Tian Y, Tokarev A, Munguia J, Ruiz A, et al. HIV-1 Vpu protein antagonizes  
593 innate restriction factor BST-2 via lipid-embedded helix-helix interactions. *The Journal of biological*  
594 *chemistry*. 2012;287(1):58-67.
- 595 28. Jain P, Boso G, Langer S, Soonthornvacharin S, De Jesus PD, Nguyen Q, et al. Large-Scale Arrayed  
596 Analysis of Protein Degradation Reveals Cellular Targets for HIV-1 Vpu. *Cell reports*. 2018;22(9):2493-  
597 503.
- 598 29. Doyotte A, Mironov A, McKenzie E, Woodman P. The Bro1-related protein HD-PTP/PTPN23 is  
599 required for endosomal cargo sorting and multivesicular body morphogenesis. *Proc Natl Acad Sci U S A*.  
600 2008;105(17):6308-13.
- 601 30. Matheson NJ, Sumner J, Wals K, Rapiteanu R, Weekes MP, Vigan R, et al. Cell Surface Proteomic  
602 Map of HIV Infection Reveals Antagonism of Amino Acid Metabolism by Vpu and Nef. *Cell host &*  
603 *microbe*. 2015;18(4):409-23.

- 604 31. Jager S, Cimermancic P, Gulbahce N, Johnson JR, McGovern KE, Clarke SC, et al. Global landscape  
605 of HIV-human protein complexes. *Nature*. 2011;481(7381):365-70.
- 606 32. Ali N, Zhang L, Taylor S, Mironov A, Urbe S, Woodman P. Recruitment of UBPY and ESCRT  
607 exchange drive HD-PTP-dependent sorting of EGFR to the MVB. *Curr Biol*. 2013;23(6):453-61.
- 608 33. Raiborg C, Bache KG, Gillooly DJ, Madshus IH, Stang E, Stenmark H. Hrs sorts ubiquitinated  
609 proteins into clathrin-coated microdomains of early endosomes. *Nat Cell Biol*. 2002;4(5):394-8.
- 610 34. Barlowe C, Schekman R. SEC12 encodes a guanine-nucleotide-exchange factor essential for  
611 transport vesicle budding from the ER. *Nature*. 1993;365(6444):347-9.
- 612 35. Dube M, Paquay C, Roy BB, Bego MG, Mercier J, Cohen EA. HIV-1 Vpu antagonizes BST-2 by  
613 interfering mainly with the trafficking of newly synthesized BST-2 to the cell surface. *Traffic*.  
614 2011;12(12):1714-29.
- 615 36. Charneau P, Mirambeau G, Roux P, Paulous S, Buc H, Clavel F. HIV-1 reverse transcription. A  
616 termination step at the center of the genome. *Journal of molecular biology*. 1994;241(5):651-62.
- 617 37. Greenberg ME, Bronson S, Lock M, Neumann M, Pavlakis GN, Skowronski J. Co-localization of  
618 HIV-1 Nef with the AP-2 adaptor protein complex correlates with Nef-induced CD4 down-regulation. *The*  
619 *EMBO journal*. 1997;16(23):6964-76.
- 620 38. Yang X, Boehm JS, Yang X, Salehi-Ashtiani K, Hao T, Shen Y, et al. A public genome-scale lentiviral  
621 expression library of human ORFs. *Nature methods*. 2011;8(8):659-61.
- 622 39. Adachi A, Gendelman HE, Koenig S, Folks T, Willey R, Rabson A, et al. Production of acquired  
623 immunodeficiency syndrome-associated retrovirus in human and nonhuman cells transfected with an  
624 infectious molecular clone. *Journal of virology*. 1986;59(2):284-91.

- 625 40. Strebel K, Klimkait T, Martin MA. A novel gene of HIV-1, vpu, and its 16-kilodalton product.  
626 Science. 1988;241(4870):1221-3.
- 627 41. Hung V, Udeshi ND, Lam SS, Loh KH, Cox KJ, Pedram K, et al. Spatially resolved proteomic  
628 mapping in living cells with the engineered peroxidase APEX2. Nature protocols. 2016;11(3):456-75.
- 629 42. Lapek JD, Jr., Lewinski MK, Wozniak JM, Guatelli J, Gonzalez DJ. Quantitative Temporal Viromics  
630 of an Inducible HIV-1 Model Yields Insight to Global Host Targets and Phospho-Dynamics Associated  
631 with Protein Vpr. Mol Cell Proteomics. 2017;16(8):1447-61.
- 632 43. Huang da W, Sherman BT, Lempicki RA. Systematic and integrative analysis of large gene lists  
633 using DAVID bioinformatics resources. Nature protocols. 2009;4(1):44-57.
- 634 44. Huang da W, Sherman BT, Lempicki RA. Bioinformatics enrichment tools: paths toward the  
635 comprehensive functional analysis of large gene lists. Nucleic acids research. 2009;37(1):1-13.
- 636 45. Shannon P, Markiel A, Ozier O, Baliga NS, Wang JT, Ramage D, et al. Cytoscape: a software  
637 environment for integrated models of biomolecular interaction networks. Genome Res.  
638 2003;13(11):2498-504.
- 639 46. Szklarczyk D, Gable AL, Lyon D, Junge A, Wyder S, Huerta-Cepas J, et al. STRING v11: protein-  
640 protein association networks with increased coverage, supporting functional discovery in genome-wide  
641 experimental datasets. Nucleic acids research. 2019;47(D1):D607-D13.
- 642

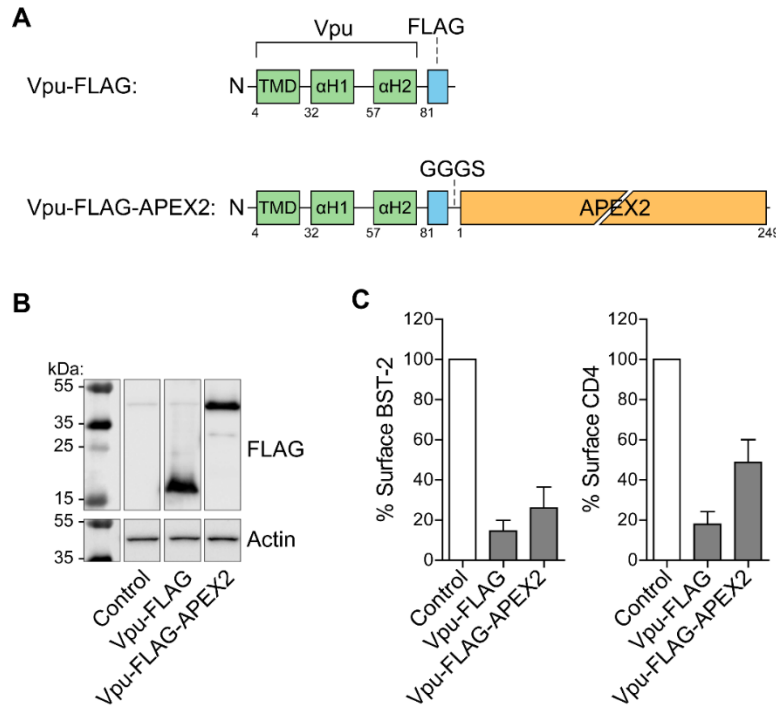

643

644 **Figure 1. Vpu-APEX2 fusion protein design and activity.** (A) A schematic representation of C-terminally  
645 tagged Vpu constructs; Vpu-FLAG and Vpu-FLAG-APEX2. A GGGG linker lies between the FLAG epitope  
646 and APEX2. (B) HeLa P4.R5 cells were transfected with Vpu constructs bearing C-terminal FLAG or FLAG  
647 and APEX2. Protein expression was analysed by western blot. (C) Cell-surface levels of BST-2 and CD4  
648 were measured in the presence of Vpu-FLAG or Vpu-FLAG-APEX2 by flow cytometry. Surface levels of  
649 BST-2 and CD4 on cells expressing FLAG- or FLAG-APEX2-tagged Vpu was expressed as the % of control  
650 cells not expressing Vpu. Error bars represent standard deviation of n=3 experiments.



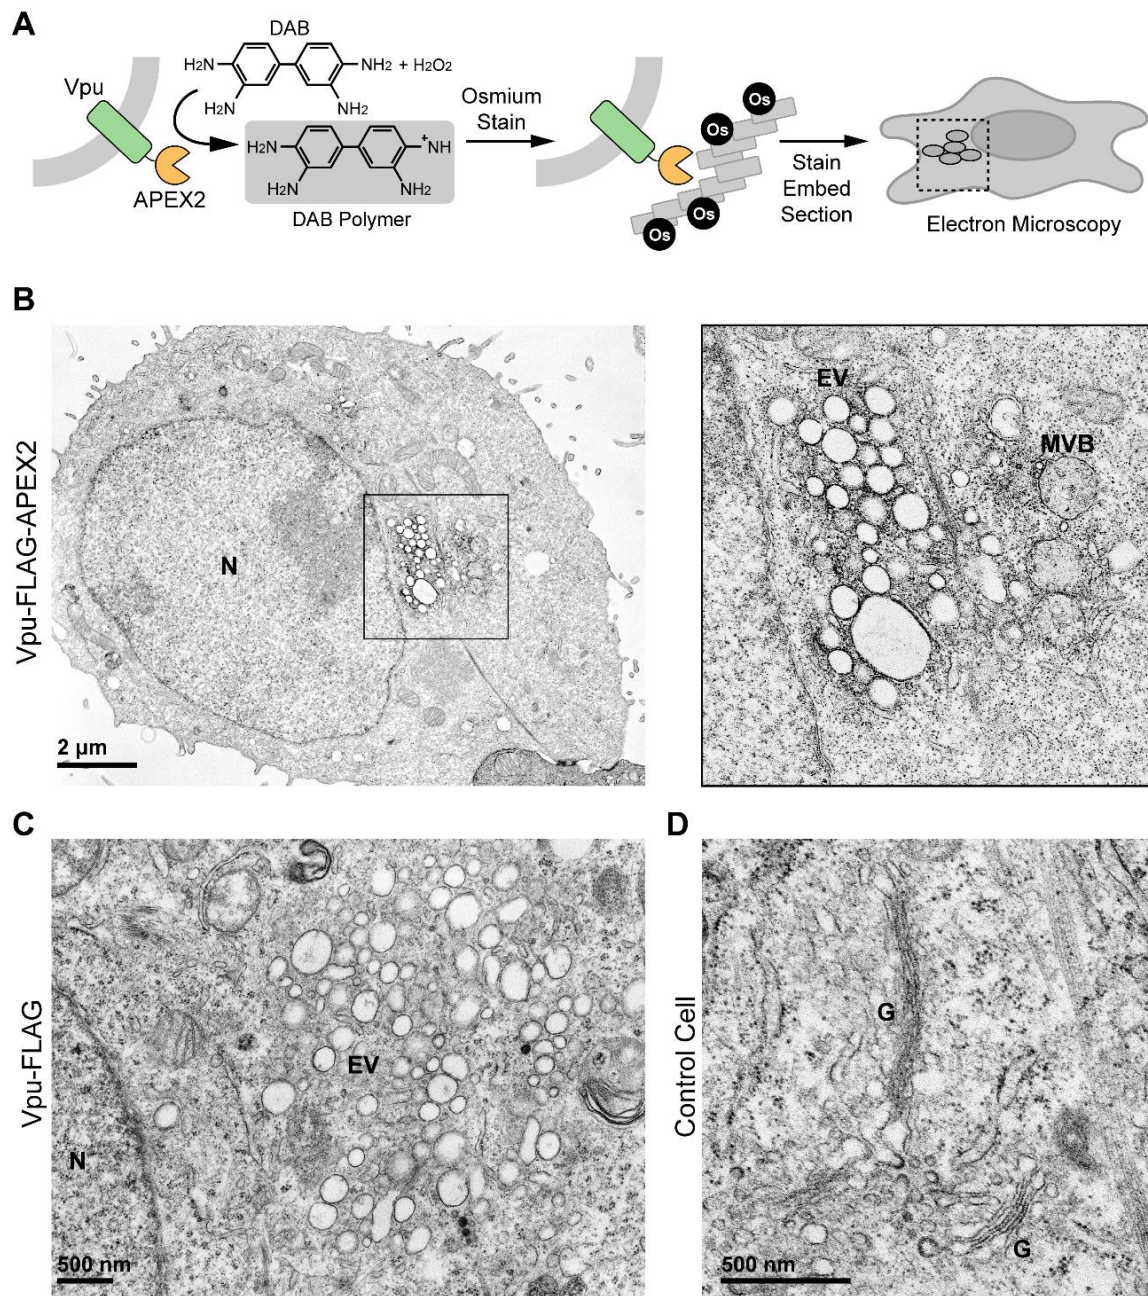

651

652 **Figure 2. Vpu-APEX2 localizes to enlarged juxtannuclear endosomes and the limiting membranes of**  
653 **multi-vesicular bodies.** (A) Schematic depicting APEX2 staining protocol for visualization by electron  
654 microscopy. (B) HeLa P4.R5 cells were transfected with the codon-optimized Vpu constructs bearing a  
655 C-terminal APEX2 tag. 24 hours later the cells were fixed before APEX2-dependent polymerization of  
656 DAB in the presence of hydrogen peroxide. The cells were then stained with OsO<sub>4</sub>, processed, and



657 imaged by transmission electron microscopy (TEM). Left panel: Cells expressing Vpu-APEX2 contain  
658 juxtannuclear accumulations of osmium-highlighted enlarged vesicles (EV) likely derived from the Golgi  
659 and endosomes. Right panel: a higher magnification image of the juxtannuclear region of the cell shown  
660 at left. The limiting membranes of vesicles resembling multivesicular bodies (MVB) are highlighted by  
661 osmium. (C) Cells expressing Vpu (without an APEX2 tag) also contain enlarged juxtannuclear vesicles. (D)  
662 A control image showing Golgi (G) stacks in non-transfected HeLa P4.R5 cells.

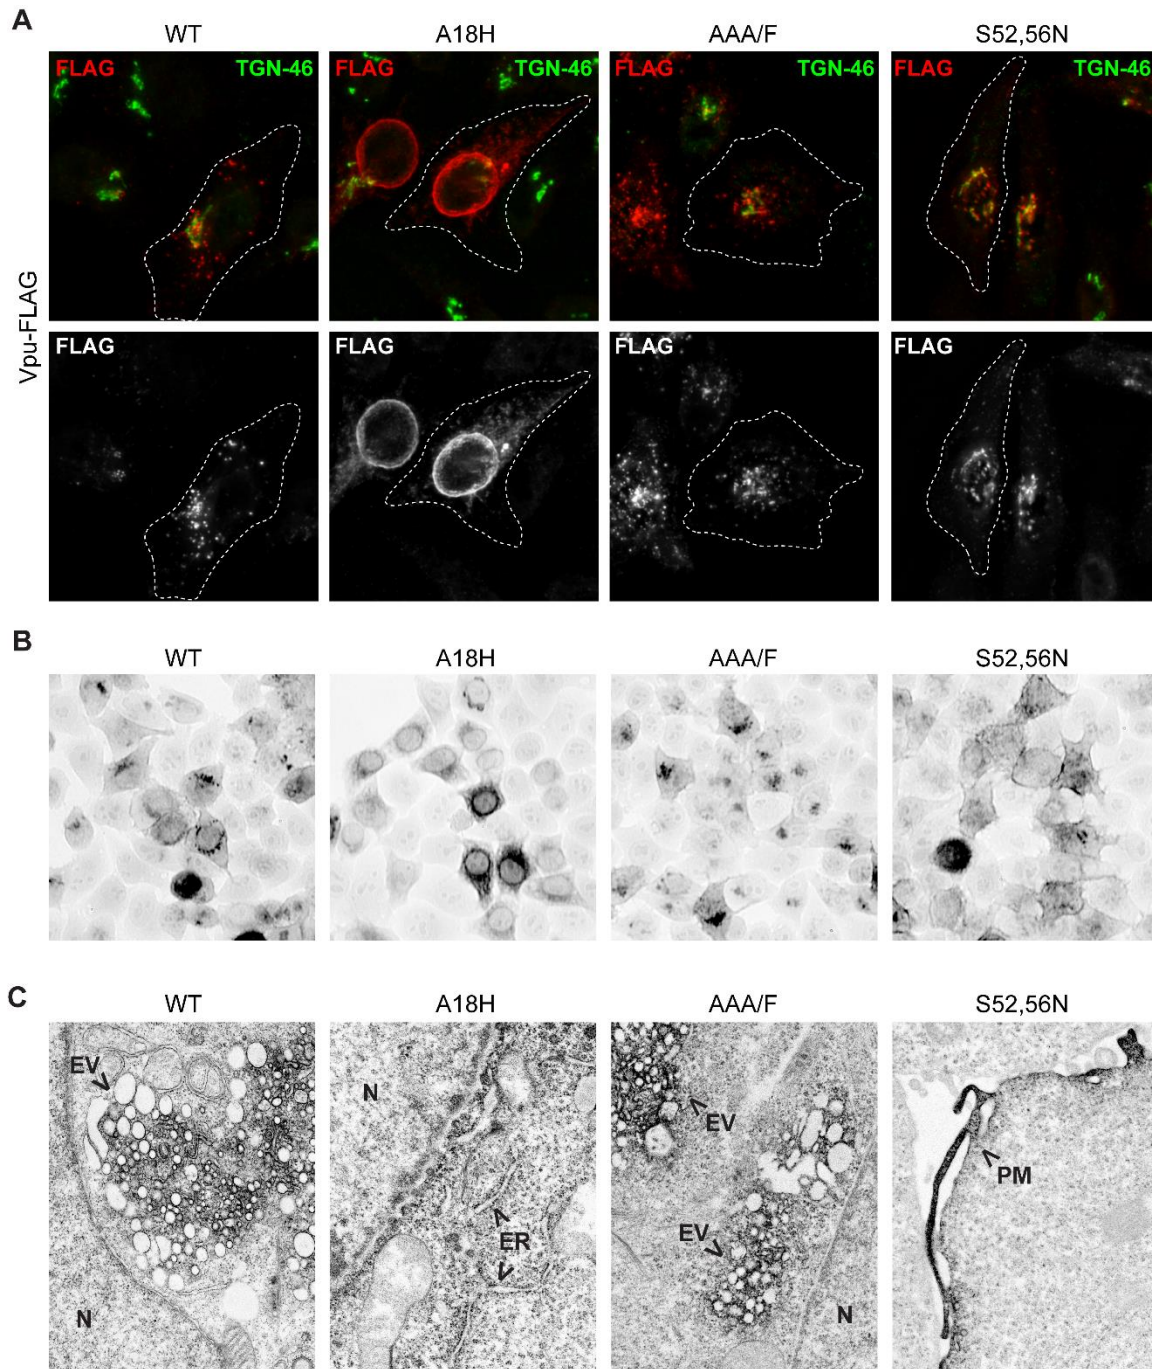

663

664 **Figure 3. Light and electron microscopic distributions of Vpu-APEX2 and mutants A18H, AAA/F, and**

665 **S52,56N.** (A) HeLa P4.R5 cells were transfected to express Vpu-FLAG (A), either wild type or encoding

666 the mutations A18H, AAA/F, or S52,56N. The cells were fixed and stained for FLAG (shown in red) and

667 TGN-46 (shown in green). (B) HeLa P4.R5 cells were transfected to express Vpu WT and the indicated

668 mutants tagged with APEX2; 24 hours later the cells were reacted with DAB in the presence of hydrogen  
669 peroxide. The cells were stained and osmiophilic DAB polymer visualized in whole-cells by brightfield  
670 microscopy. (C) Thin-section electron microscopy of cells expressing Vpu WT-, A18H-, AAA/F-, or  
671 S52,56N-APEX2. Arrows indicate concentrations of osmiophilic polymer stain. N = nucleus, ER =  
672 endoplasmic reticulum, PM = plasma membrane.

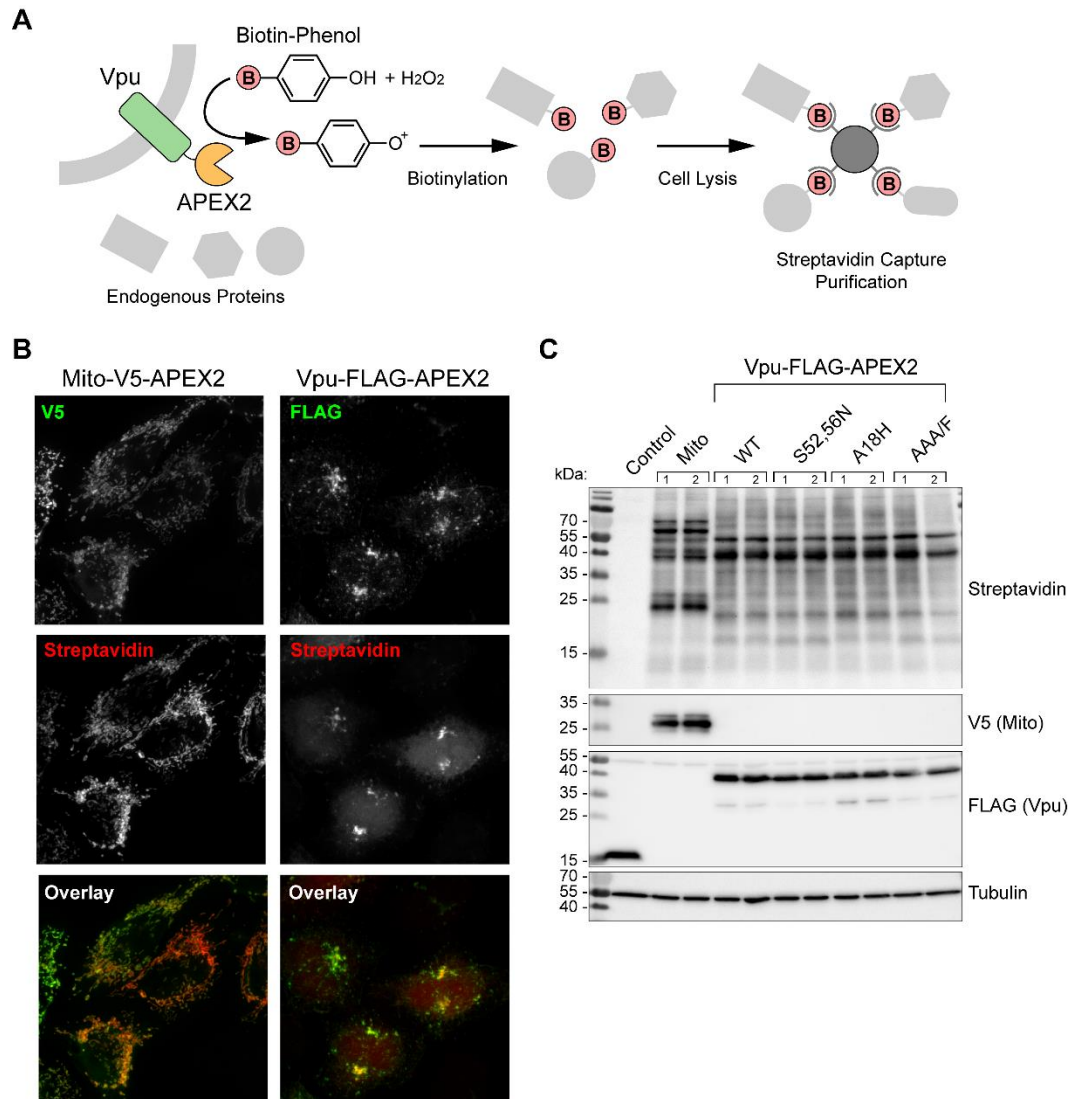

673

674 **Figure 4. Biotinylation of Vpu-APEX2 proximal proteins.** (A) Schematic representation of APEX2-  
675 mediated biotinylation reaction; in the presence of hydrogen peroxide and biotin-phenol, APEX2  
676 catalyses biotinylation of nearby proteins, which can be captured by streptavidin. (B) Detection of  
677 biotinylated proteins by immunofluorescent-streptavidin. HeLa P4.R5 cells expressing Mito-V5-APEX2 or  
678 Vpu-FLAG-APEX2 were incubated with biotin phenol and hydrogen peroxide for 1 minute before  
679 quenching, fixation, and staining with streptavidin-alexa594 (red) and anti-V5 or anti-FLAG (green). (C)  
680 Biotinylation pattern of protein species visualized by western blot; HeLa P4.R5 cells transfected to  
681 express Mito-V5-APEX or WT Vpu-, S52,56N-, A18H-, or AAA/F-FLAG-APEX2 were incubated with biotin-

682 phenol, lysed and proteins separated by SDS-PAGE and western blot. Biotinylated proteins were  
683 detected using streptavidin-HRP. The control cells were transfected to express Vpu-FLAG only;  
684 streptavidin staining is absent in the absence of APEX2.

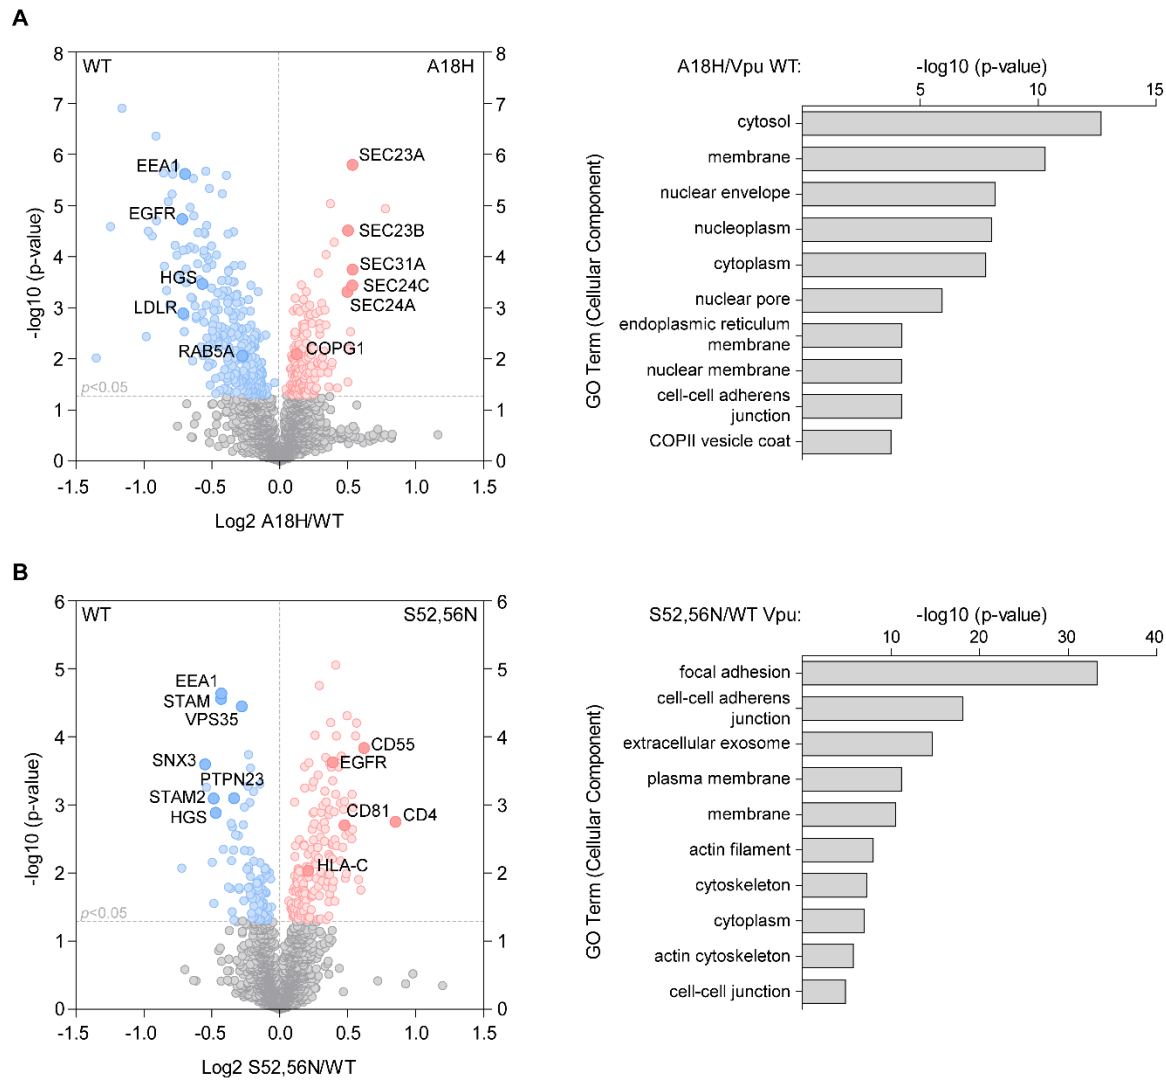

685

686 **Figure 5. Pair-wise comparisons of the proximity-omes of wild type Vpu relative to the ER-retained**  
 687 **Vpu-A18H and the plasma-membrane-enriched Vpu-S52,56N mutants.** HeLa P4.R5 cells were  
 688 transfected to express Vpu constructs bearing C-terminal APEX2 tags, in duplicate. Following proximity  
 689 biotinylation reactions, the biotinylated proteins were isolated and subject to quantitative mass  
 690 spectrometry. Volcano plots of protein enrichment in the presence of Vpu mutants A18H or S52,56N  
 691 relative to the wild-type Vpu are shown, n=2 experiments. Significantly enriched proteins highlighted in  
 692 red and blue are derived from the Student's *t*-test ( $p < 0.05$ ). (A) The A18H mutant was enriched in  
 693 proteins derived from the biosynthetic pathway, including the ER (labeled), while WT Vpu was enriched

694 for proteins associated with plasma and endosomal membranes (labeled). (B) The S52,56N mutant was  
695 enriched in proteins derived from the plasma membrane (labeled), while WT Vpu was again enriched in  
696 endosomal sorting proteins (labeled). Proteins enriched by the S52,56N mutation included the known  
697 targets CD4, CD81, and HLA-C, and possible targets EGFR and CD55. For both (A) and (B), the x-axis  
698 shows log<sub>2</sub> fold change of proteins enriched by mutant/WT Vpu and the y-axis -log<sub>10</sub> of *p*-value derived  
699 from Student's *t*-test. The 10 most highly enriched gene ontology (cellular component) terms are shown  
700 on the right of each volcano plot, corresponding to significantly enriched proteins proximal to the  
701 mutants; *p*-value derived from Bonferroni test.

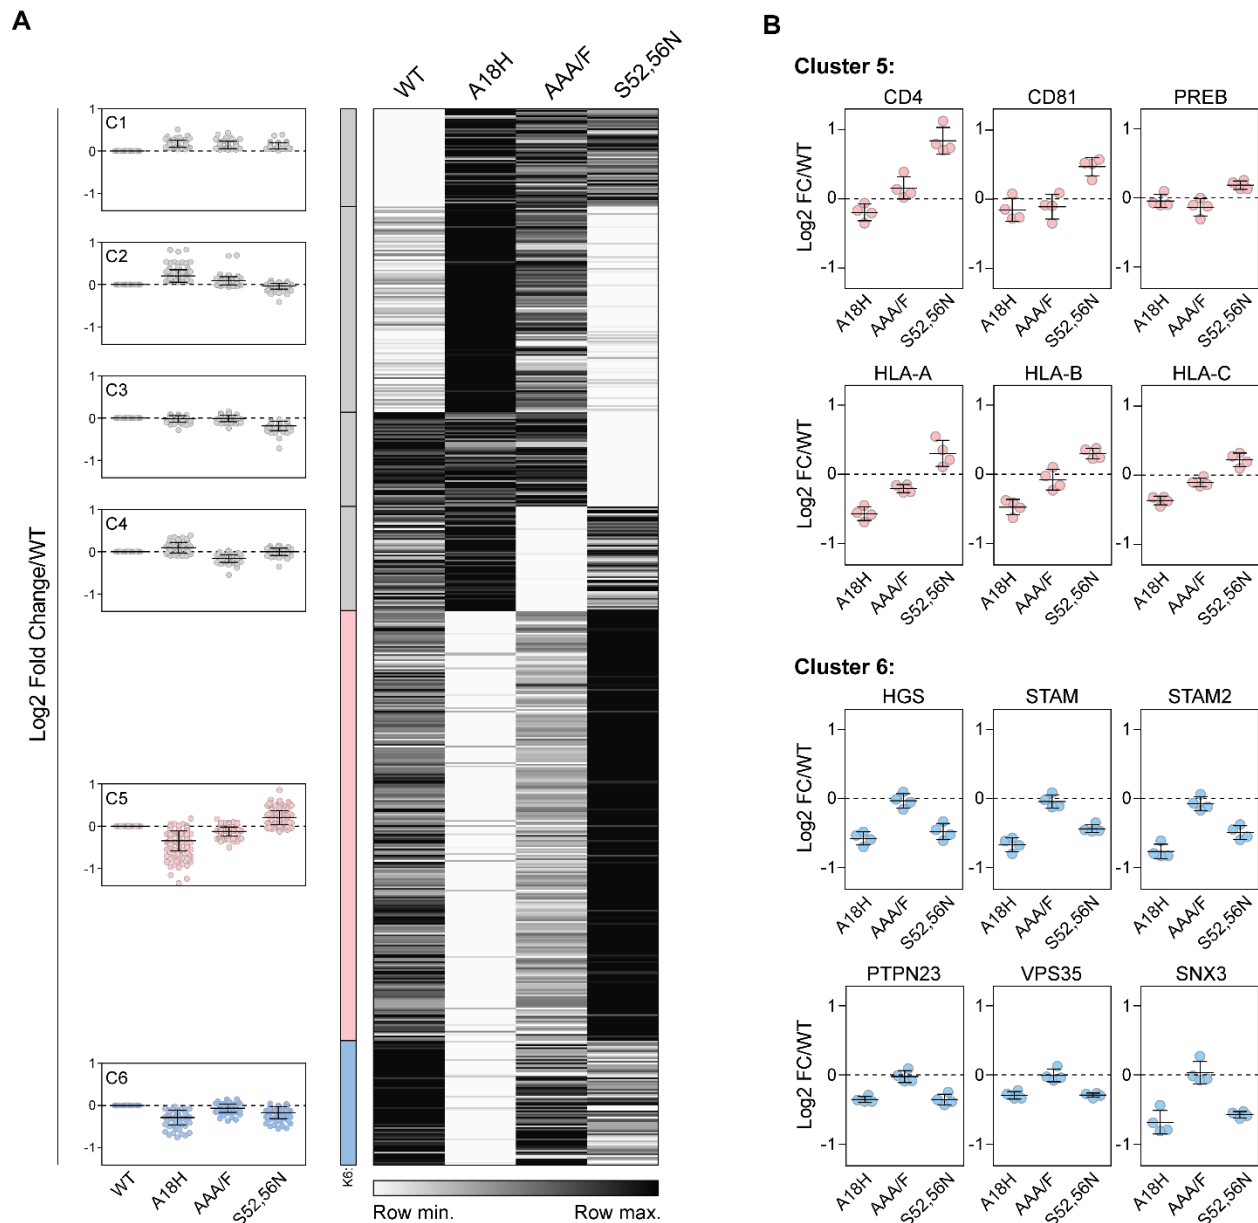

702

703 **Figure 6. Heat map and k-means clustering of proteins (384) for which any Vpu-mutant was**

704 **significantly different from wild type.** (A) Heatmap of the relative abundance of proteins measured in

705 Vpu-APEX2 WT and mutant samples. The heatmap was sorted into 6 clusters by k-means clustering

706 analysis; the cluster profile is shown on the left. Data are presented as the fold change in protein

707 abundance relative to WT. (B) Cluster 5 contains known and potential targets of Vpu, including CD4,

708 CD81, and HLA-C. k-means cluster 6 contains potential serine-dependent cofactors of Vpu, including



709 endosomal sorting proteins. Data are derived from duplicate samples per condition, from two  
710 independent experiments.



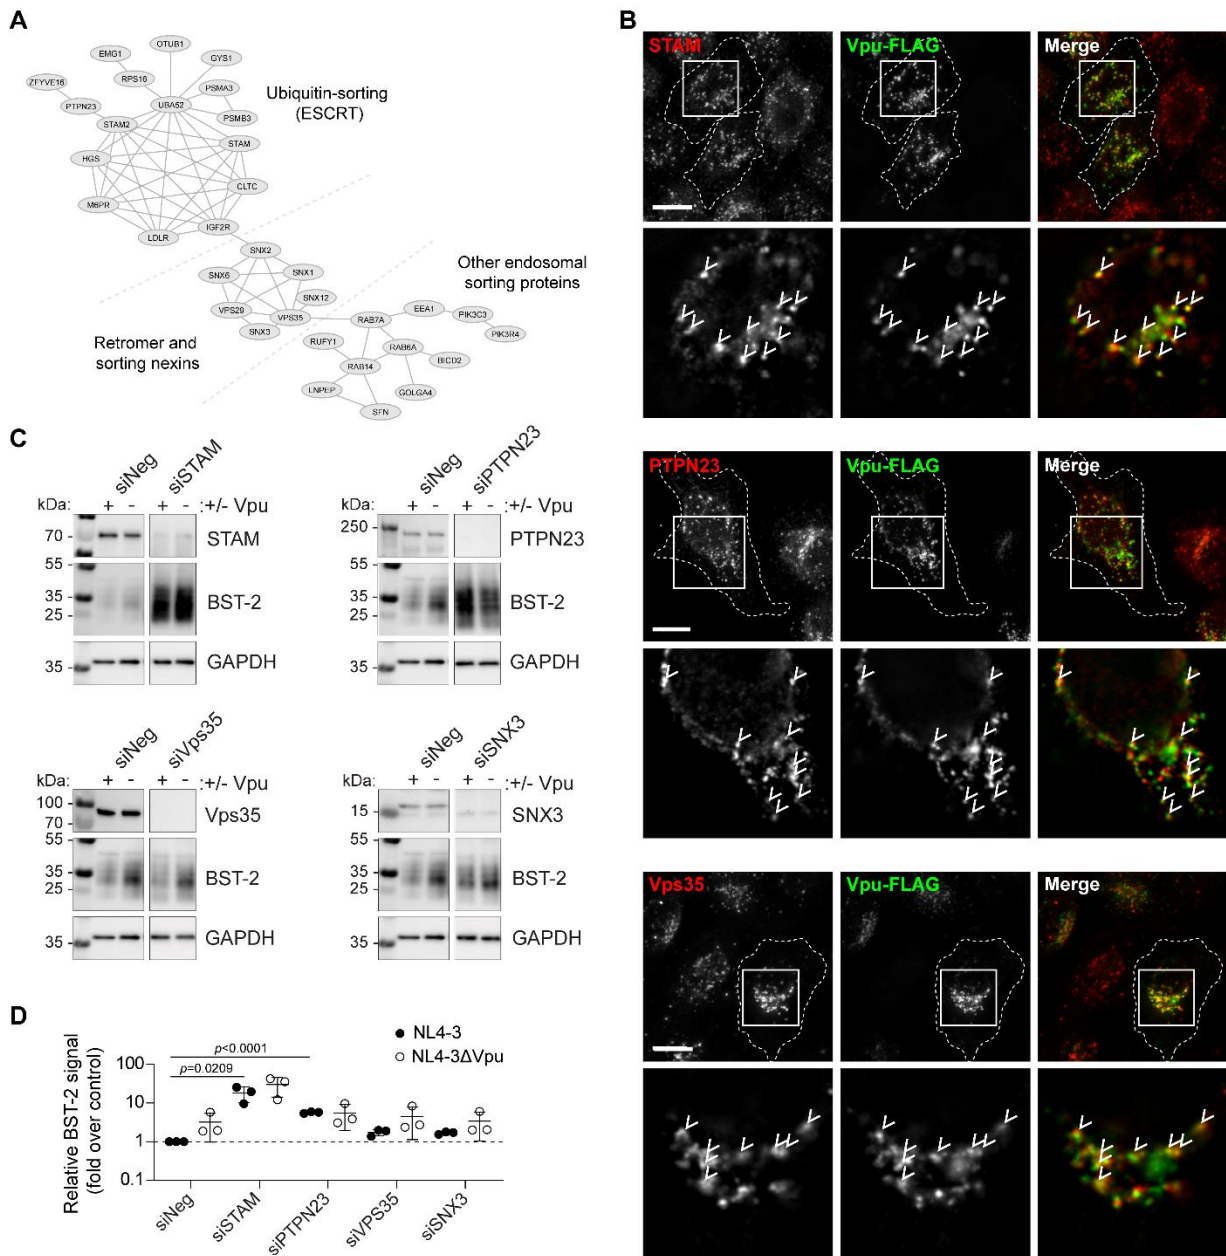

719

720 **Figure 8. Potential Vpu cofactors: STRING relationships, co-localization with Vpu, and effects on**

721 **expression of the Vpu-target BST-2.** (A) The interactions of proteins in k-means cluster 6 (Figure 6) were

722 visualized using the STRINGdb (Cytoscape) network analysis tool. The interrelated proteins identified

723 represent candidate Vpu cofactors. (B) Immunofluorescence microscopy of Vpu-FLAG and some of the

724 candidate cofactors. HeLa P4.R5 cells were transfected to express Vpu-FLAG. Cells were fixed and

725 stained for the indicated endogenous proteins. Images are z-stack projections of full cell volumes; insets

726 show single z-sections, with arrows indicating colocalized foci. Scale bars are 10  $\mu\text{m}$ . (C) Candidate  
727 cofactor proteins were transiently knocked-down using siRNAs in HeLa P4.R5 cells. The cells were  
728 transfected with pNL4-3 (an HIV proviral plasmid expressing the complete viral genome including Vpu)  
729 or pNL4-3 $\Delta$ Vpu 48 hours later. The cells were lysed 24 hours post-transfection and BST-2 was probed by  
730 SDS-PAGE and western blotting. (D) BST-2 signals were measured relative to loading control (GAPDH)  
731 and presented as fold signal over NL4-3 (negative control siRNA; Vpu-expressed). Data are mean  $\pm$  SD  
732 of three independent experiments; *p*-value determined by Student's *t*-test.

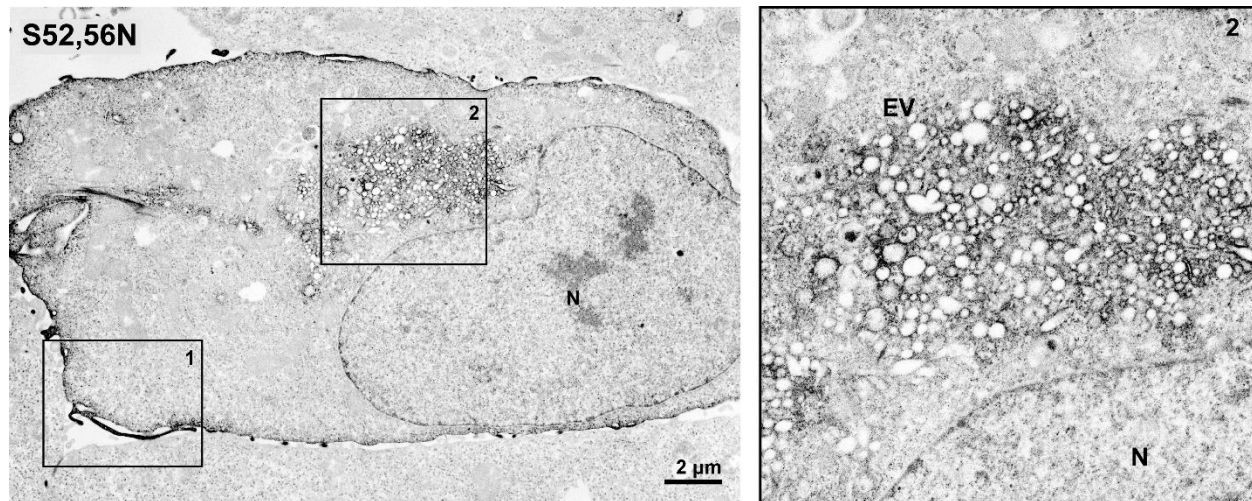

733

734 **Figure S1. Juxtannuclear endosomal distortion in cells expressing Vpu-S52,56N-APEX2.** HeLa P4.R5 cells  
735 were transfected to express Vpu-S52,56N-APEX2. 24 hours later the cells were fixed before APEX2-  
736 dependent polymerization of DAB and osmium staining. Cells were embedded in resin and 70 nm  
737 sections collected and analysed by TEM. The mutant Vpu-S52,56N was localized to the plasma  
738 membrane region (region 1 is shown at higher resolution in Fig. 3) but also induced formation of juxta-  
739 nuclear enlarged vesicles (EV, region 2), similar to the WT Vpu.



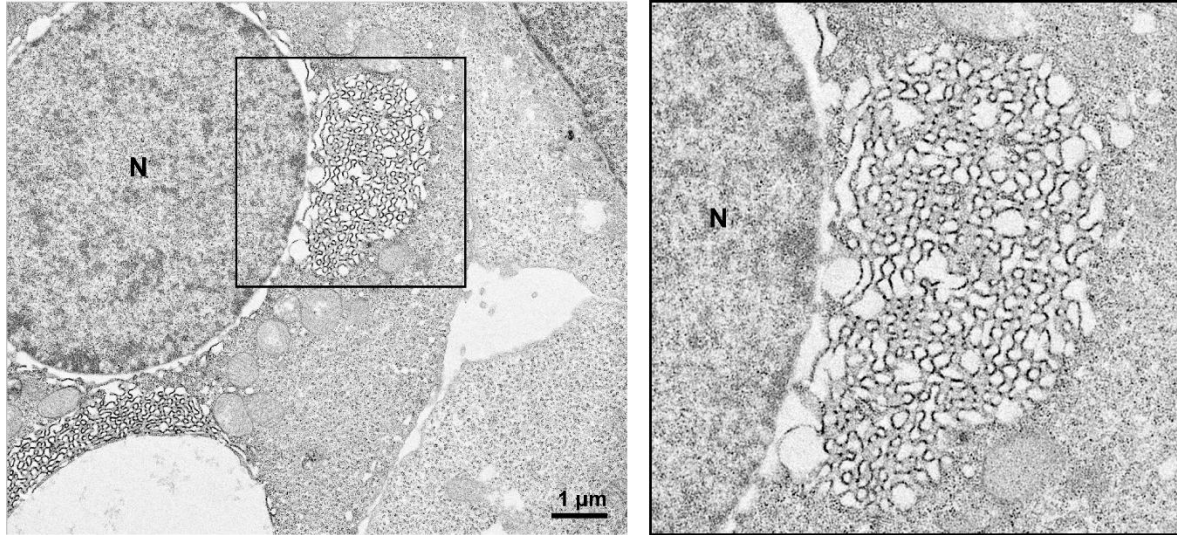

741 **Figure S2. Exuberant ER membranes in cells expressing Vpu-A18H-APEX2.** HeLa P4.R5 cells were  
742 transfected with a VpHu-A18H construct bearing a C-terminal APEX2 tag. 24 hours later the cells were  
743 fixed before APEX2-dependent polymerization of DAB and osmium staining. Cells were embedded in  
744 resin and 70 nm sections collected and analysed by TEM. The endoplasmic reticulum-trapped mutant,  
745 A18H, was restricted to the nuclear envelope (NE) and ER and induced membrane reorganisation: when  
746 expressed at high levels, the nuclear envelope was distorted by the accumulation of convoluted, smooth  
747 membranes.

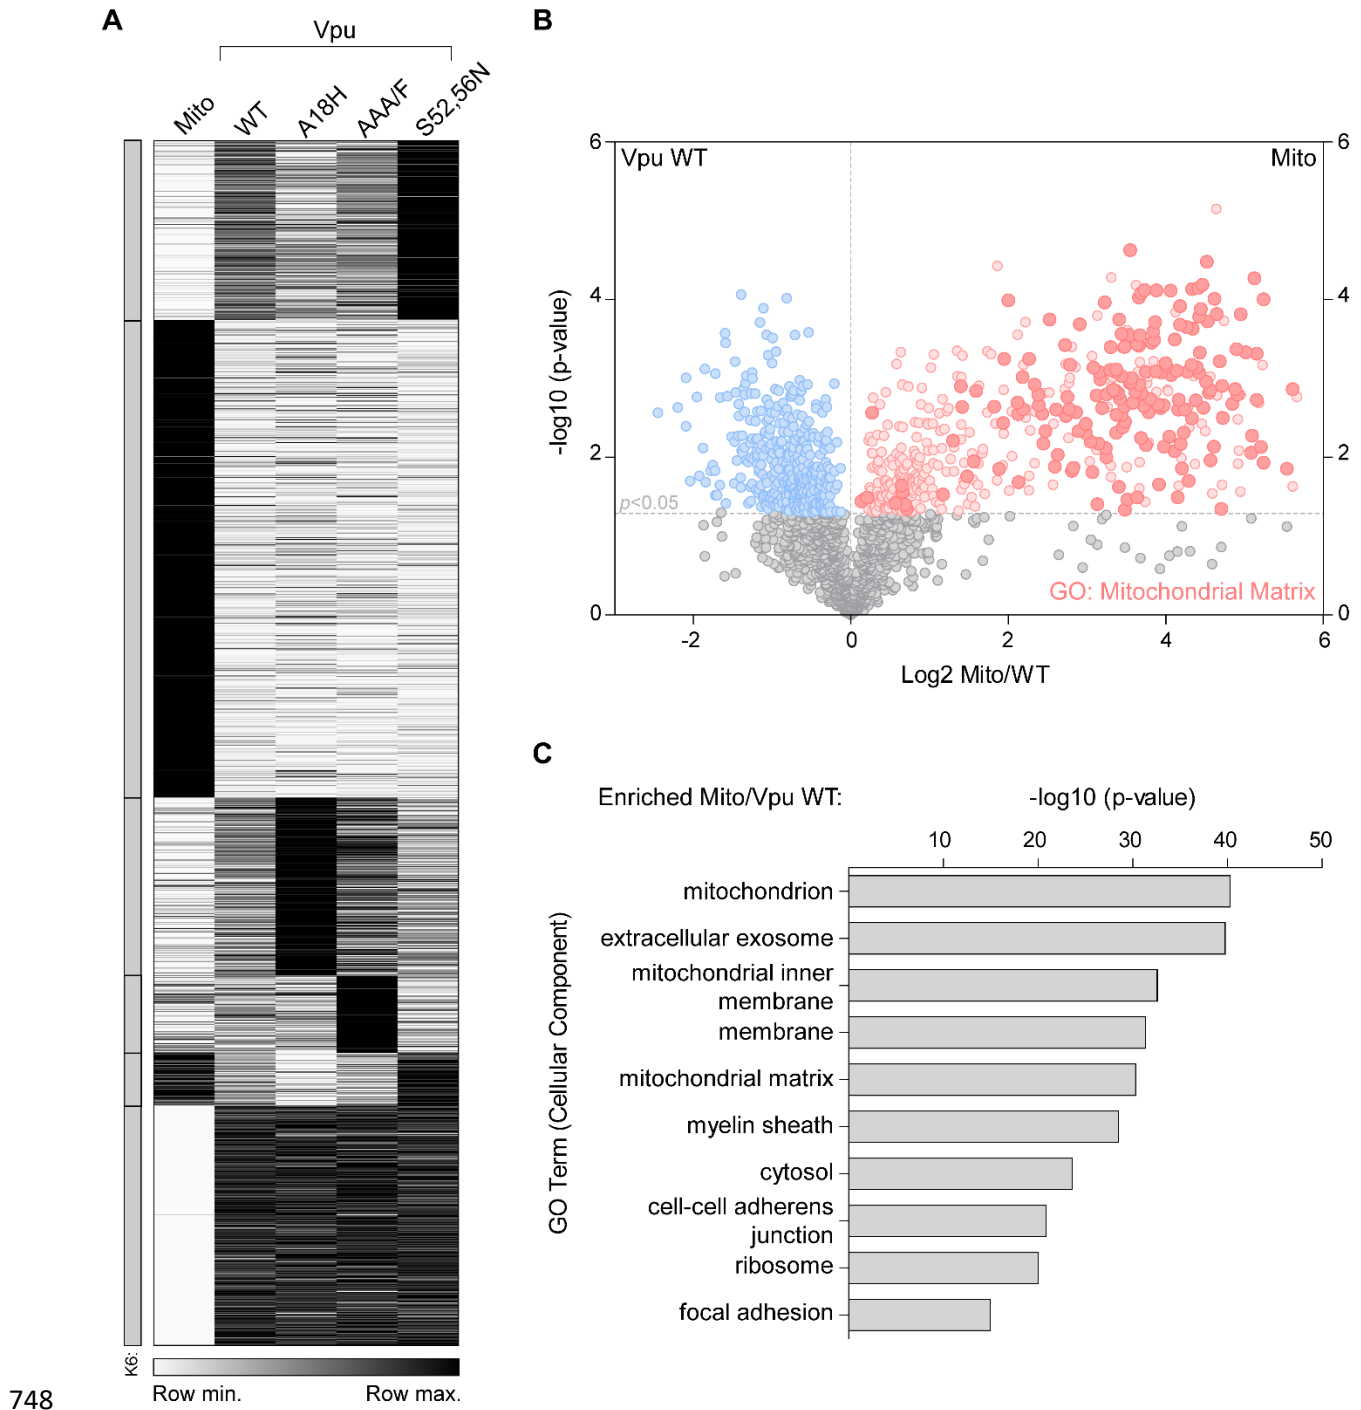

753 Mito control and Vpu WT and mutant samples, sorted into 6 k-means clusters (cluster number derived  
754 from elbow method). (B) Volcano plot of proteins biotinylated by Vpu-APEX2 vs. Mito-APEX2 control.  
755 Mitochondrial proteins corresponding to GO term Mitochondrial Matrix are highlighted. The x-axis  
756 shows log<sub>2</sub> fold change and y-axis -log<sub>10</sub> *p*-value derived from Student's *t*-test. (C) GO enrichment  
757 analysis of proteins significantly enriched by Mito-APEX compared to Vpu WT, the top ten GO (cell  
758 component) terms are shown.



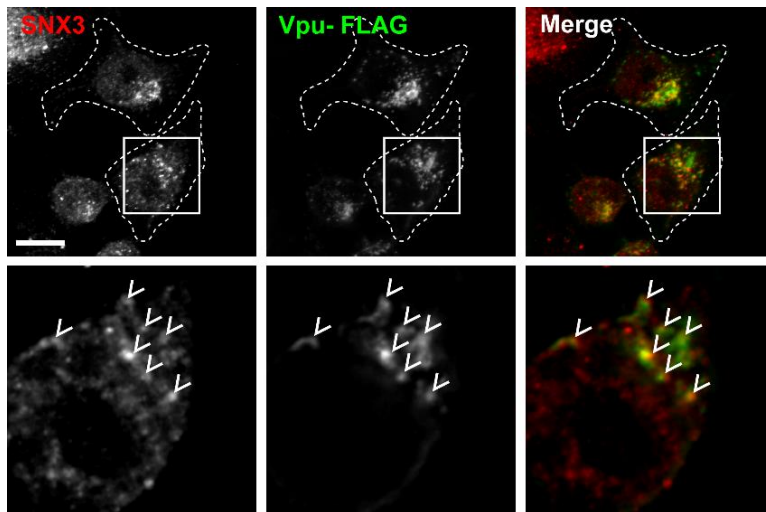

759

760 **Figure S4. Immunofluorescence microscopy of Vpu-FLAG and candidate cofactor SNX3.** HeLa P4.R5  
761 cells were transfected to express Vpu-FLAG. Cells were fixed and stained for endogenous SNX3 protein  
762 24 hours post-transfection. Images are z-stack projections of full cell volumes; insets show single z-  
763 sections, with arrows indicating colocalized foci. Scale bars are 10  $\mu$ m. Some punctate colocalization of  
764 Vpu and SNX3 was observed in the perinuclear region, in agreement with immunofluorescent stain of  
765 Vpu and retromer component Vps35.
